# Supplementary material for: A systematic understanding of gelation self-assembly: solvophobically assisted supramolecular gelation via conformational reorientation across amide functionality on a hydrophobically modulated dipeptide based ambidextrous gelator, N-n-acyl-(l)Val-X(OBn), (X = 1,ω-amino acid)
Source: Royal Society of Chemistry journal article supplement (doi:10.1039/c5ra10209j), 2015-01-01
Supplement: c5ra10209j1.pdf [file c5ra10209j1.pdf]

## Supporting Information:

**A systematic understanding of gelation self-assembly: Solvophobic assisted supramolecular gelation via conformational reorientation across amide functionality on a hydrophobically modulated dipeptide based ambidextrous gelator, N-n-acyl-(L)Val-X(OBn), (X = 1, $\omega$ -amino acid)**

*Saubhik Haldar\* and Koninika Karmakar*

*Department of Chemistry, Jadavpur University, Kolkata 700 032, INDIA*

### ***Index***

|                                          |                    |
|------------------------------------------|--------------------|
| <b>Scheme of Synthesis.....</b>          | <b>S-ii</b>        |
| <b>Synthetic procedure .....</b>         | <b>S-iii-vi</b>    |
| <b><sup>1</sup>H-NMR spectrum .....</b>  | <b>S-vi-ix</b>     |
| <b><sup>13</sup>C-NMR spectrum .....</b> | <b>S-x-xiii</b>    |
| <b>Table: Gelation properties .....</b>  | <b>S-xiv</b>       |
| <b>Rheology .....</b>                    | <b>S-xv-xvi</b>    |
| <b>Thermal stability .....</b>           | <b>S-xvi-xvii</b>  |
| <b>X-ray diffraction study .....</b>     | <b>S-xviii-xxi</b> |
| <b>Solvent effect .....</b>              | <b>S-xxii-xxiv</b> |
| <b>CD .....</b>                          | <b>S-xxv-xxvi</b>  |
| <b>FTIR .....</b>                        | <b>S-xxvii-xxx</b> |

**Scheme:**

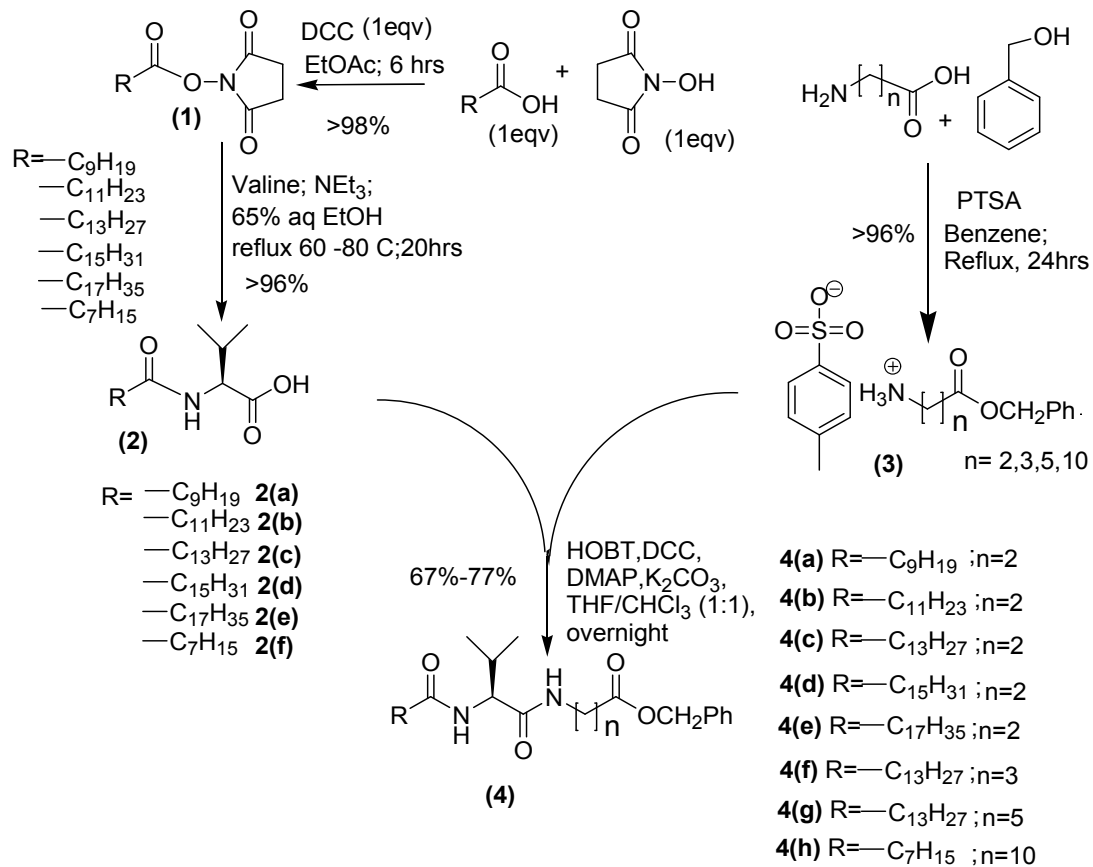

## Synthetic procedure:

**Synthesis of NHS ester of Fatty acids (1):** To a solution of Fatty acid (1eqv) in 10 ml Ethyl acetate, N-hydroxysuccinimide (1eqv) was added followed by the addition of DCC (Dicyclohexylcarbodiimide) (1eqv) in 5 ml Ethyl acetate and the reaction stirred for 6-7 hrs. Completion of the reaction was confirmed by TLC. The reaction mixture was then filtered and the filtrate was concentrated under reduced pressure. The obtained residue was recrystallized from isopropanol and used for the next step without any further purification. (~98% yield).

**Synthesis of N-Acyl-valine (2):** To a solution of NHS ester of fatty acids (8.4 mmole, 1 eqv), (L)-Valine (1.2 eqv) in 40 ml of 65% aq Ethanol; Triethylamine (2.5 eqv) was added and put to reflux (60-80°C) for 20 hrs. Then the reaction mixture was concentrated under reduced pressure and taken up in 25ml Ethyl acetate and washed sequentially with ice cold 1 (N) HCl (30 ml × 2), saturated brine solution (25 ml × 2). Organic layer was collected and dried over anhyd. Na<sub>2</sub>SO<sub>4</sub> and evaporated under reduced pressure to give the desired product (~8.06mmol; ~96% yield; m.p= ~95-98°C). The compounds were used for the next step without any further purification.

**2a:** <sup>1</sup>HNMR (300 MHz, CDCl<sub>3</sub>)-:δ::0.83-0.89 (t, CH<sub>3</sub> (CH<sub>2</sub>)<sub>8</sub>CONH-, 3H), 0.89-0.98 (q, (CH<sub>3</sub>)<sub>2</sub>CH-CH (COOH)NH-, 7H), 1.1-1.3 (bs, CH<sub>3</sub> (CH<sub>2</sub>)<sub>6</sub>CH<sub>2</sub>CH<sub>2</sub>CONH-, 12H), 1.56-1.7 (t, CH<sub>3</sub> (CH<sub>2</sub>)<sub>12</sub>CH<sub>2</sub>CH<sub>2</sub>CONH-, 2H), 2.2-2.35 (t, CH<sub>3</sub> (CH<sub>2</sub>)<sub>6</sub>CH<sub>2</sub>CH<sub>2</sub>CONH-, 2H), 4.55-4.64 (q, -NHCH (COOH)CH (CH<sub>3</sub>)<sub>2</sub>, 1H), 5.89-5.99 (d, -NH-, 1H).

**2b:** <sup>1</sup>HNMR (300 MHz, CDCl<sub>3</sub>)-:δ::0.88-0.92 (t, CH<sub>3</sub> (CH<sub>2</sub>)<sub>10</sub>CONH-, 3H), 0.89-1.0 (q, (CH<sub>3</sub>)<sub>2</sub>CH-CH (COOH)NH-, 7H), 1.2-1.44 (bs, CH<sub>3</sub> (CH<sub>2</sub>)<sub>8</sub>CH<sub>2</sub>CH<sub>2</sub>CONH-, 16H), 1.56-1.7 (t, CH<sub>3</sub> (CH<sub>2</sub>)<sub>12</sub>CH<sub>2</sub>CH<sub>2</sub>CONH-, 2H), 2.21-2.35 (t, CH<sub>3</sub> (CH<sub>2</sub>)<sub>8</sub>CH<sub>2</sub>CH<sub>2</sub>CONH-, 2H), 4.55-4.61 (q, -NHCH (COOH)CH (CH<sub>3</sub>)<sub>2</sub>, 1H), 5.89-5.99 (d, -NH-, 1H).

**2c:** <sup>1</sup>HNMR (300 MHz, CDCl<sub>3</sub>)-:δ::0.86-0.1 (t, CH<sub>3</sub> (CH<sub>2</sub>)<sub>12</sub>CONH-, 3H), 0.89-1.0 (q, (CH<sub>3</sub>)<sub>2</sub>CH-CH (COOH)NH-, 7H), 1.2-1.45 (bs, CH<sub>3</sub>(CH<sub>2</sub>)<sub>10</sub>CH<sub>2</sub>CH<sub>2</sub>CONH-, 20H), 1.56-1.7 (t, CH<sub>3</sub> (CH<sub>2</sub>)<sub>12</sub>CH<sub>2</sub>CH<sub>2</sub>CONH-, 2H), 2.23-2.35 (t, CH<sub>3</sub> (CH<sub>2</sub>)<sub>10</sub>CH<sub>2</sub>CH<sub>2</sub>CONH-, 2H), 4.55-4.621 (q, -NHCH (COOH)CH (CH<sub>3</sub>)<sub>2</sub>, 1H), 5.89-5.99 (d, -NH-, 1H).

**2d:** <sup>1</sup>HNMR (300 MHz, CDCl<sub>3</sub>)-:δ::0.89-0.1 (t, CH<sub>3</sub> (CH<sub>2</sub>)<sub>14</sub>CONH-, 3H), 0.89-1.0 (q, (CH<sub>3</sub>)<sub>2</sub>CH-CH (COOH)NH-, 7H), 1.25-1.44 (bs, CH<sub>3</sub>(CH<sub>2</sub>)<sub>12</sub>CH<sub>2</sub>CH<sub>2</sub>CONH-, 24H), 1.56-1.7 (t, CH<sub>3</sub> (CH<sub>2</sub>)<sub>12</sub>CH<sub>2</sub>CH<sub>2</sub>CONH-, 2H), 2.22-2.35 (t, CH<sub>3</sub> (CH<sub>2</sub>)<sub>12</sub>CH<sub>2</sub>CH<sub>2</sub>CONH-, 2H), 4.55-4.61 (q, -NHCH (COOH)CH (CH<sub>3</sub>)<sub>2</sub>, 1H), 5.89-5.99 (d, -NH-, 1H).

**2e:** <sup>1</sup>HNMR (300 MHz, CDCl<sub>3</sub>)-:δ::0.91-1.10 (t, CH<sub>3</sub> (CH<sub>2</sub>)<sub>16</sub>CONH-, 3H), 0.89-1.0 (q, (CH<sub>3</sub>)<sub>2</sub>CH-CH (COOH)NH-, 7H), 1.2-1.46 (bs, CH<sub>3</sub>(CH<sub>2</sub>)<sub>14</sub>CH<sub>2</sub>CH<sub>2</sub>CONH-, 28H), 1.56-1.7 (t, CH<sub>3</sub> (CH<sub>2</sub>)<sub>12</sub>CH<sub>2</sub>CH<sub>2</sub>CONH-, 2H), 2.23-2.35 (t, CH<sub>3</sub> (CH<sub>2</sub>)<sub>14</sub>CH<sub>2</sub>CH<sub>2</sub>CONH-, 2H), 4.55-4.611 (q, -NHCH (COOH)CH (CH<sub>3</sub>)<sub>2</sub>, 1H), 5.89-5.99 (d, -NH-, 1H).

**Synthesis of p-toluenesulfonatesalt of 1-ω-Aminoacid benzylester (3):** In 100ml of benzene a mixture of 1-ω-Aminoacid (1 eqv), p-toluenesulfonic acid (PTSA).H<sub>2</sub>O (1.1 eqv) and benzyl alcohol (2 eqv) was taken. After refluxing in Dean-Stark apparatus for 24hrs, 40 ml of diethyl ether was added to it with immediate precipitation of PTSA-salt of 1-ω-Aminoacid benzyl ester. The salt was then filtered, washed

with 10ml of dry diethyl ether and dried under reduced pressure. This compound was used for the next step without any further purification.( yield~96 %)

**Synthesis of (4):**To a solution of N-Acyl-(L)-valine (1 eqv) in 5ml of THF, Hydroxybenzotriazole (HOBt) (1.5 eqv) was added and kept on stirring in ice water bath at 0°C. After 10mins of stirring, DMAP (1 eqv) and a solution of DCC (1.93 eqv) in 5 ml of CHCl<sub>3</sub> was added to it and kept stirring. Finally, after 15mins, K<sub>2</sub>CO<sub>3</sub> (1.47 eqv) and PTSA-salt of 1- $\omega$ -Amino acid benzyl ester (1.2 eqv) was added and kept on stirring overnight at room temperature. The reaction mixture was then concentrated under reduced pressure and taken up in 30 ml CHCl<sub>3</sub> and washed sequentially with ice cold 1 (N) HCl (25 ml  $\times$  2), saturated brine (25 ml  $\times$  2). The organic layer was collected and dried over anhyd Na<sub>2</sub>SO<sub>4</sub> and then purified by silicagel (60-120 mesh) column chromatography in EtOAc/Petroleum ether solvent system of required ratios (~40% -60%) to get the desired product.

**4a.** Yield%=77%. <sup>1</sup>H NMR (300 MHz, CDCl<sub>3</sub>) :  $\delta_{\text{H}}$  :: 0.875-0.918 (t, -NHCOCH<sub>2</sub>CH<sub>2</sub> (CH<sub>2</sub>)<sub>6</sub>CH<sub>3</sub> and >CHCH (CH<sub>3</sub>)<sub>2</sub>, 9H), 1.27 (bs, -NHCOCH<sub>2</sub>CH<sub>2</sub>(CH<sub>2</sub>)<sub>6</sub>CH<sub>3</sub>, 12H), 1.58-1.65 (m, -NHCOCH<sub>2</sub>CH<sub>2</sub> (CH<sub>2</sub>)<sub>6</sub>CH<sub>3</sub>, >CHCH (CH<sub>3</sub>)<sub>2</sub>, 3H), 2.11-2.24 (t, -NHCOCH<sub>2</sub>CH<sub>2</sub>(CH<sub>2</sub>)<sub>6</sub>CH<sub>3</sub>, 2H), 2.59-2.62 (t, -CONHCH<sub>2</sub>CH<sub>2</sub>COOCH<sub>2</sub>Ph, 2H), 3.5-3.6 (m, CONHCH<sub>2</sub>CH<sub>2</sub>COOCH<sub>2</sub>Ph, 2H), 4.17-4.2 (t, >CHCH (CH<sub>3</sub>)<sub>2</sub>, 1H), 5.09-5.1 (s, -CONHCH<sub>2</sub>CH<sub>2</sub>COOCH<sub>2</sub>Ph, 2H), 6.11-6.13 (d, -NHCOCH<sub>2</sub>CH<sub>2</sub> (CH<sub>2</sub>)<sub>6</sub>CH<sub>3</sub>, 1H), 6.52 (s, -CONHCH<sub>2</sub>CH<sub>2</sub>COOCH<sub>2</sub>Ph, 1H), 7.26-7.35 (bs, aromatic, 5H). <sup>13</sup>C NMR(75 MHz, CDCl<sub>3</sub>) :  $\delta_{\text{C}}$  : 173.42, 172.56, 171.41, 135.58, 128.62, 128.4, 128.2, 77.46, 77.04, 76.61, 66.54, 58.35, 36.73, 36.67, 35.00, 33.96, 31.84, 31.19, 29.43, 29.32, 29.24, 25.74, 22.64, 19.12, 18.24, 14.07. ESI-MS (m/z) C<sub>25</sub>H<sub>40</sub>N<sub>2</sub>O<sub>4</sub> (EXACT MASS= 432.3) 433.3(100%, [M + H]<sup>+</sup>), 455.3(49%, [M + Na]<sup>+</sup>).

**4b.** Yield=73%. <sup>1</sup>H NMR (300 MHz, CDCl<sub>3</sub>) :  $\delta_{\text{H}}$  :: 0.87-0.91(t, -NHCOCH<sub>2</sub>CH<sub>2</sub> (CH<sub>2</sub>)<sub>8</sub>CH<sub>3</sub> and >CHCH (CH<sub>3</sub>)<sub>2</sub>, 9H), 1.269 (bs, -NHCOCH<sub>2</sub>CH<sub>2</sub>(CH<sub>2</sub>)<sub>8</sub>CH<sub>3</sub>, 16H), 1.63-1.74 (m, -NHCOCH<sub>2</sub>CH<sub>2</sub> (CH<sub>2</sub>)<sub>8</sub>CH<sub>3</sub>, >CHCH (CH<sub>3</sub>)<sub>2</sub>, 3H), 2.11-2.2 (t, -NHCOCH<sub>2</sub>CH<sub>2</sub>(CH<sub>2</sub>)<sub>8</sub>CH<sub>3</sub>, 2H), 2.58-2.62 (t, -CONHCH<sub>2</sub>CH<sub>2</sub>COOCH<sub>2</sub>Ph, 2H), 3.5-3.63 (m, CONHCH<sub>2</sub>CH<sub>2</sub>COOCH<sub>2</sub>Ph, 2H), 4.17-4.22 (t, >CHCH (CH<sub>3</sub>)<sub>2</sub>, 1H), 5.12 (s, -CONHCH<sub>2</sub>CH<sub>2</sub>COOCH<sub>2</sub>Ph, 2H), 6.10-6.13 (d, -NHCOCH<sub>2</sub>CH<sub>2</sub> (CH<sub>2</sub>)<sub>8</sub>CH<sub>3</sub>, 1H), 6.51(s, -CONHCH<sub>2</sub>CH<sub>2</sub>COOCH<sub>2</sub>Ph, 1H), 7.37 (bs, aromatic, 5H). <sup>13</sup>C NMR(75 MHz, CDCl<sub>3</sub>) :  $\delta_{\text{C}}$  : 173.2, 171.97, 171.35, 135.58, 128.62, 128.4, 128.3, 77.46, 77.04, 76.61, 66.61, 58.28, 36.73, 34.9, 33.9, 31.8, 31.2, 29.6, 29.4, 29.32, 29.2, 25.74, 22.6, 19.12, 18.2, 14.09. ESI-MS (m/z) C<sub>27</sub>H<sub>44</sub>N<sub>2</sub>O<sub>4</sub> (EXACT MASS= 460.33) 461.34(100%, [M + H]<sup>+</sup>), 483.32(34%, [M + Na]<sup>+</sup>).

**4c.** Yield=76%. <sup>1</sup>H NMR (300 MHz, CDCl<sub>3</sub>) :  $\delta_{\text{H}}$  :: 1.1-1.25 (t, -NHCOCH<sub>2</sub>CH<sub>2</sub> (CH<sub>2</sub>)<sub>10</sub>CH<sub>3</sub> and >CHCH (CH<sub>3</sub>)<sub>2</sub>, 9H), 1.57 (bs, -NHCOCH<sub>2</sub>CH<sub>2</sub>(CH<sub>2</sub>)<sub>10</sub>CH<sub>3</sub>, 20H), 1.87-2.03 (m, -NHCOCH<sub>2</sub>CH<sub>2</sub> (CH<sub>2</sub>)<sub>10</sub>CH<sub>3</sub>, >CHCH (CH<sub>3</sub>)<sub>2</sub>, 3H), 2.3-2.4 (t, -NHCOCH<sub>2</sub>CH<sub>2</sub>(CH<sub>2</sub>)<sub>6</sub>CH<sub>3</sub>, 2H), 2.79-2.81 (t, -CONHCH<sub>2</sub>CH<sub>2</sub>COOCH<sub>2</sub>Ph, 2H), 3.49 (s, CONHCH<sub>2</sub>CH<sub>2</sub>COOCH<sub>2</sub>Ph, 2H), 4.19-4.32 (t, >CHCH (CH<sub>3</sub>)<sub>2</sub>, 1H), 5.12 (s, -CONHCH<sub>2</sub>CH<sub>2</sub>COOCH<sub>2</sub>Ph, 2H), 6.12-6.13 (t, -NHCOCH<sub>2</sub>CH<sub>2</sub> (CH<sub>2</sub>)<sub>10</sub>CH<sub>3</sub>, 1H), 6.63-6.651(t, -CONHCH<sub>2</sub>CH<sub>2</sub>COOCH<sub>2</sub>Ph, 1H), 7.29-7.37 (m, aromatic, 5H). <sup>13</sup>C NMR(75 MHz, CDCl<sub>3</sub>) :  $\delta_{\text{C}}$  : 173.27, 172.93, 171.407, 135.6, 128.62, 128.4, 128.28, 77.46, 77.041, 76.61, 66.59, 58.256, 36.7, 34.976, 33.99, 33.69, 31.9, 31.2, 29.63, 29.49, 29.33, 29.28, 25.75, 25.54, 25.544, 24.865, 24.77, 22.67, 19.13, 18.22, 14.09. ESI-MS (m/z) C<sub>29</sub>H<sub>48</sub>N<sub>2</sub>O<sub>4</sub> (EXACT MASS= 488.36) 489.369(100%, [M + H]<sup>+</sup>), 511.36(51%, [M + Na]<sup>+</sup>).

**4d.** Yield=72%. <sup>1</sup>H NMR (300 MHz, CDCl<sub>3</sub>) :  $\delta_{\text{H}}$  :: 0.875-0.918 (m, -NHCOCH<sub>2</sub>CH<sub>2</sub> (CH<sub>2</sub>)<sub>12</sub>CH<sub>3</sub> and >CHCH (CH<sub>3</sub>)<sub>2</sub>, 9H), 1.27 (bs, -NHCOCH<sub>2</sub>CH<sub>2</sub>(CH<sub>2</sub>)<sub>12</sub>CH<sub>3</sub>, 24H), 1.58-1.65 (m, -NHCOCH<sub>2</sub>CH<sub>2</sub>

(CH<sub>2</sub>)<sub>12</sub>CH<sub>3</sub>, >CHCH (CH<sub>3</sub>)<sub>2</sub>, 3H), 2.11-2.24 (t, -NHCOCH<sub>2</sub>CH<sub>2</sub>(CH<sub>2</sub>)<sub>12</sub>CH<sub>3</sub>, 2H), 2.59-2.62 (t, -CONHCH<sub>2</sub>CH<sub>2</sub>COOCH<sub>2</sub>Ph, 2H), 3.5-3.6 (m, CONHCH<sub>2</sub>CH<sub>2</sub>COOCH<sub>2</sub>Ph, 2H), 4.17-4.2 (t, >CHCH (CH<sub>3</sub>)<sub>2</sub>, 1H), 5.09-5.1 (s, -CONHCH<sub>2</sub>CH<sub>2</sub>COOCH<sub>2</sub>Ph, 2H), 6.11-6.13 (d, -NHCOCH<sub>2</sub>CH<sub>2</sub>(CH<sub>2</sub>)<sub>12</sub>CH<sub>3</sub>, 1H), 6.52 (s, -CONHCH<sub>2</sub>CH<sub>2</sub>COOCH<sub>2</sub>Ph, 1H), 7.26-7.35 (bs, aromatic, 5H). <sup>13</sup>C NMR(75 MHz, CDCl<sub>3</sub>) :δ<sub>C</sub> : 173.6, 172.4, 171.8, 135.64, 128.6, 128.34, 128.18, 77.47, 77.05, 76.62, 66.53, 57.53, 41.35, 36.53, 35.02, 33.9, 33.47, 31.9, 29.67, 29.64, 29.61, 29.5, 29.33, 29.26, 25.64, 24.81, 22.82, 22.66, 22.20, 14.08.ESI-MS (m/z) C<sub>31</sub>H<sub>52</sub>N<sub>2</sub>O<sub>4</sub> (EXACT MASS=516.37) 517.379 (100%, [M + H]<sup>+</sup>), 539.37 (20%, [M + Na]<sup>+</sup>).

**4e.**Yield=69%.<sup>1</sup>HNMR (300 MHz, CDCl<sub>3</sub>) : δ:: 0.85-0.89(m, -NHCOCH<sub>2</sub>CH<sub>2</sub> (CH<sub>2</sub>)<sub>14</sub>CH<sub>3</sub> and >CHCH (CH<sub>3</sub>)<sub>2</sub>, 9H), 1.24 (bs, -NHCOCH<sub>2</sub>CH<sub>2</sub>(CH<sub>2</sub>)<sub>14</sub>CH<sub>3</sub>, 28H), 1.6 (s, -NHCOCH<sub>2</sub>CH<sub>2</sub> (CH<sub>2</sub>)<sub>14</sub>CH<sub>3</sub>, >CHCH (CH<sub>3</sub>)<sub>2</sub>, 3H), 2.14-2.19 (t, -NHCOCH<sub>2</sub>CH<sub>2</sub>(CH<sub>2</sub>)<sub>14</sub>CH<sub>3</sub>, 2H), 2.56-2.60 (t, -CONHCH<sub>2</sub>CH<sub>2</sub>COOCH<sub>2</sub>Ph, 2H), 3.5-3.54 (t, CONHCH<sub>2</sub>CH<sub>2</sub>COOCH<sub>2</sub>Ph, 2H), 4.35-4.42 mt, >CHCH (CH<sub>3</sub>)<sub>2</sub>, 1H), 5.13 (s, -CONHCH<sub>2</sub>CH<sub>2</sub>COOCH<sub>2</sub>Ph, 2H), 6.11-6.13 (d, -NHCOCH<sub>2</sub>CH<sub>2</sub> (CH<sub>2</sub>)<sub>14</sub>CH<sub>3</sub>, 1H), 6.62 (s, -CONHCH<sub>2</sub>CH<sub>2</sub>COOCH<sub>2</sub>Ph, 1H), 7.35 (bs, aromatic, 5H). <sup>13</sup>C NMR(75 MHz, CDCl<sub>3</sub>) :δ<sub>C</sub> : 173.24, 172.56, 135.62, 128.62, 128.4, 128.3, 77.44, 77.21, 76.6, 66.68, 58.35, 36.75, 34.97, 34.8, 34.13, 33.39, 31.9, 31.17, 29.68, 29.65, 29.61, 29.48, 29.34, 29.26, 25.73, 25.68, 22.68, 19.1, 18.2, 14.1.ESI-MS (m/z) C<sub>33</sub>H<sub>56</sub>N<sub>2</sub>O<sub>4</sub> (EXACT MASS=544.42) 545.429(100%, [M + H]<sup>+</sup>), 567.4(49%, [M + Na]<sup>+</sup>).

**4f.**Yield=69%.<sup>1</sup>HNMR (300 MHz, CDCl<sub>3</sub>) : δ :: 0.85-0.91 (m, -NHCOCH<sub>2</sub>CH<sub>2</sub> (CH<sub>2</sub>)<sub>10</sub>CH<sub>3</sub> and >CHCH (CH<sub>3</sub>)<sub>2</sub>, 9H), 1.4 (bs, -NHCOCH<sub>2</sub>CH<sub>2</sub>(CH<sub>2</sub>)<sub>10</sub>CH<sub>3</sub>, 20H), 1.58-1.65 (m, -NHCOCH<sub>2</sub>CH<sub>2</sub> (CH<sub>2</sub>)<sub>10</sub>CH<sub>3</sub>, >CHCH (CH<sub>3</sub>)<sub>2</sub>, 3H), 1.93-1.94 (t, -CONHCH<sub>2</sub>CH<sub>2</sub>CH<sub>2</sub>COOCH<sub>2</sub>Ph, 2H), 2.08-2.17 (t, -NHCOCH<sub>2</sub>CH<sub>2</sub> (CH<sub>2</sub>)<sub>10</sub>CH<sub>3</sub>, 2H), 2.55-2.59 (t, -CONHCH<sub>2</sub>CH<sub>2</sub>CH<sub>2</sub>COOCH<sub>2</sub>Ph, 2H), 3.44-3.59 (m, -CONHCH<sub>2</sub>CH<sub>2</sub>CH<sub>2</sub>COOCH<sub>2</sub>Ph, 2H), 4.37-4.39 (t, >CHCH (CH<sub>3</sub>)<sub>2</sub>, 1H), 5.132 (bs, -CONHCH<sub>2</sub>CH<sub>2</sub>CH<sub>2</sub>COOCH<sub>2</sub>Ph, 2H), 5.89 (s, -NHCOCH<sub>2</sub>CH<sub>2</sub> (CH<sub>2</sub>)<sub>10</sub>CH<sub>3</sub>, 1H), 6.58 (s, -CONHCH<sub>2</sub>CH<sub>2</sub>CH<sub>2</sub>COOCH<sub>2</sub>Ph, 1H), 7.35 (bs, aromatic, 5H). <sup>13</sup>C NMR(75 MHz, CDCl<sub>3</sub>) :δ<sub>C</sub> : 173.45, 173.26, 171.39, 135.75, 128.54, 128.32, 128.22, 77.45, 77.23, 77.03, 76.61, 66.44, 58.36, 38.92, 36.78, 36.70, 31.92, 31.76, 31.62, 30.95, 29.49, 29.35, 25.76, 24.61, 24.47, 22.68, 19.26, 14.11.ESI-MS (m/z) C<sub>27</sub>H<sub>44</sub>N<sub>2</sub>O<sub>4</sub> (EXACT MASS= 502.38) 503.389 (100%, [M + H]<sup>+</sup>), 525.38 (68%, [M + Na]<sup>+</sup>), 541.3 (28%, [M + K]<sup>+</sup>).

**4g.**Yield=69%.<sup>1</sup>HNMR (300 MHz, CDCl<sub>3</sub>) : δ :: 0.84-0.85 (m, -NHCOCH<sub>2</sub>CH<sub>2</sub> (CH<sub>2</sub>)<sub>10</sub>CH<sub>3</sub> and >CHCH (CH<sub>3</sub>)<sub>2</sub>, 9H), 1.25 (bs, -NHCOCH<sub>2</sub>CH<sub>2</sub>(CH<sub>2</sub>)<sub>10</sub>CH<sub>3</sub>, -CONHCH<sub>2</sub>CH<sub>2</sub>(CH<sub>2</sub>)<sub>2</sub>CH<sub>2</sub>COOCH<sub>2</sub>Ph 24H), 1.6 (s, -NHCOCH<sub>2</sub>CH<sub>2</sub>(CH<sub>2</sub>)<sub>10</sub>CH<sub>3</sub>, >CHCH (CH<sub>3</sub>)<sub>2</sub>, 3H), 1.780-1.788 (d, -CONHCH<sub>2</sub>CH<sub>2</sub>(CH<sub>2</sub>)<sub>2</sub>CH<sub>2</sub>COOCH<sub>2</sub>Ph, 2H), 2.08-2.2 (t, -NHCOCH<sub>2</sub>CH<sub>2</sub> (CH<sub>2</sub>)<sub>10</sub>CH<sub>3</sub>, 2H), 2.56-2.60 (t, -CONHCH<sub>2</sub>CH<sub>2</sub>(CH<sub>2</sub>)<sub>2</sub>CH<sub>2</sub>COOCH<sub>2</sub>Ph, 2H), 3.44-3.58 (m, -CONHCH<sub>2</sub>CH<sub>2</sub>(CH<sub>2</sub>)<sub>2</sub>CH<sub>2</sub>COOCH<sub>2</sub>Ph, 2H), 4.17-4.22 (t, >CHCH (CH<sub>3</sub>)<sub>2</sub>, 1H), 5.09-5.13 (s, -CONH(CH<sub>2</sub>)<sub>5</sub>COOCH<sub>2</sub>Ph, 2H), 6.01-6.04 (d, -NHCOCH<sub>2</sub>CH<sub>2</sub> (CH<sub>2</sub>)<sub>10</sub>CH<sub>3</sub>, 1H), 6.35 (s, -CONH(CH<sub>2</sub>)<sub>5</sub>COOCH<sub>2</sub>Ph, 1H), 7.35 (bs, aromatic, 5H). <sup>13</sup>C NMR(75 MHz, CDCl<sub>3</sub>) :δ<sub>C</sub> : 173.27, 172.93, 171.407, 135.58, 128.62, 128.4, 128.28, 77.46, 77.041, 76.61, 66.59, 58.256, 40.2, 36.73, 36.67, 35.00, 33.1, 31.84, 31.19, 29.63, 29.49, 29.33, 29.28, 25.74, 25.54, 22.64, 18.212, 17.124, 14.102.ESI-MS (m/z) C<sub>27</sub>H<sub>44</sub>N<sub>2</sub>O<sub>4</sub> (EXACT MASS= 530.41) 531.419(100%, [M + H]<sup>+</sup>), 553.421 (62%, [M + Na]<sup>+</sup>).

**4h.**Yield=69%.<sup>1</sup>HNMR (300 MHz, CDCl<sub>3</sub>) : δ:: 0.846-0.934 (m, -NHCOCH<sub>2</sub>CH<sub>2</sub> (CH<sub>2</sub>)<sub>4</sub>CH<sub>3</sub> and >CHCH (CH<sub>3</sub>)<sub>2</sub>, 9H), 1.233-1.280 (m, -NHCOCH<sub>2</sub>CH<sub>2</sub>(CH<sub>2</sub>)<sub>4</sub>CH<sub>3</sub>, -CONH(CH<sub>2</sub>)<sub>2</sub>(CH<sub>2</sub>)<sub>7</sub>CH<sub>2</sub>COOCH<sub>2</sub>Ph, 22H), 1.476-1.495 (d, -NHCOCH<sub>2</sub>CH<sub>2</sub>(CH<sub>2</sub>)<sub>4</sub>CH<sub>3</sub>, -CONHCH<sub>2</sub>CH<sub>2</sub>(CH<sub>2</sub>)<sub>6</sub>CH<sub>2</sub>CH<sub>2</sub>COOCH<sub>2</sub>Ph, 4H), 1.970-2.0 (m, >CHCH (CH<sub>3</sub>)<sub>2</sub>, 1H), 2.130-2.243 (m, -CONHCH<sub>2</sub>CH<sub>2</sub>(CH<sub>2</sub>)<sub>7</sub>CH<sub>2</sub>COOCH<sub>2</sub>Ph, 2H), 2.3-2.36 (m, -NHCOCH<sub>2</sub>CH<sub>2</sub>(CH<sub>2</sub>)<sub>4</sub>CH<sub>3</sub>, 2H), 3.2-3.266 (m, -CONHCH<sub>2</sub>(CH<sub>2</sub>)<sub>9</sub>COOCH<sub>2</sub>Ph, 2H), 4.084-4.25

(m,  $>CHCH(CH_3)_2$ , 1H), 5.11 (s,  $-CONH(CH_2)_{10}COOCH_2Ph$ , 2H), 6.625-6.719 (m,  $-NHCO(CH_2)_6CH_3$ ,  $-CONH(CH_2)_{10}COOCH_2Ph$ , 2H), 7.35 (s, aromatic, 5H).  $^{13}C$  NMR(75 MHz,  $CDCl_3$ ) : $\delta_C$  : 173.42, 172.56, 171.41, 135.58, 128.62, 128.4, 128.2, 77.46, 77.041, 76.61, 66.54, 58.35, 40.3, 36.73, 36.67, 35.00, 33.1, 31.84, 31.19, 29.7, 29.7, 29.43, 29.32, 29.24, 28.7 25.74, 22.64, 17.4, 17.1, 14.1.ESI-MS (m/z)  $C_{27}H_{44}N_2O_4$  (EXACT MASS= 516.37) 517.379(100%,  $[M + H]^+$ ), 539.39(58%,  $[M + Na]^+$ ), 555.329(18%,  $[M + K]^+$ ).

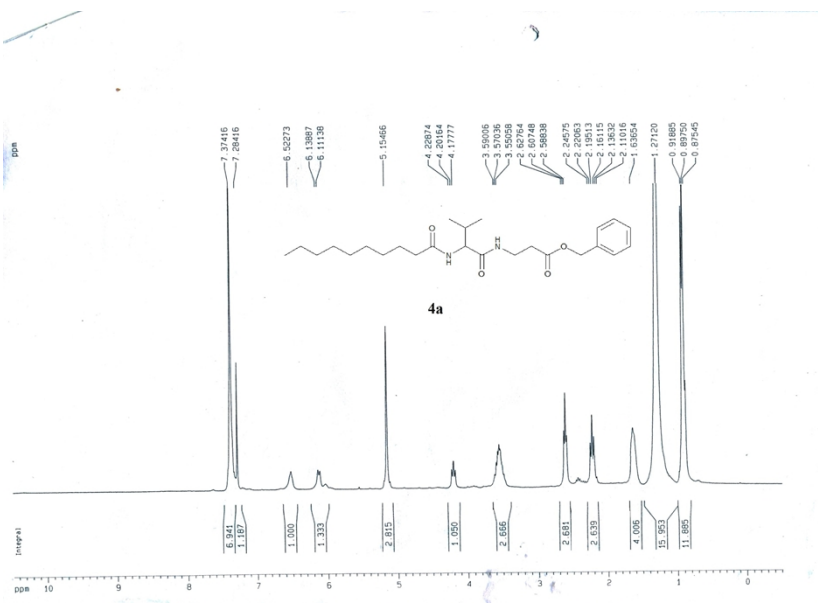

$^1H$ NMR spectra of gelator **4a**.

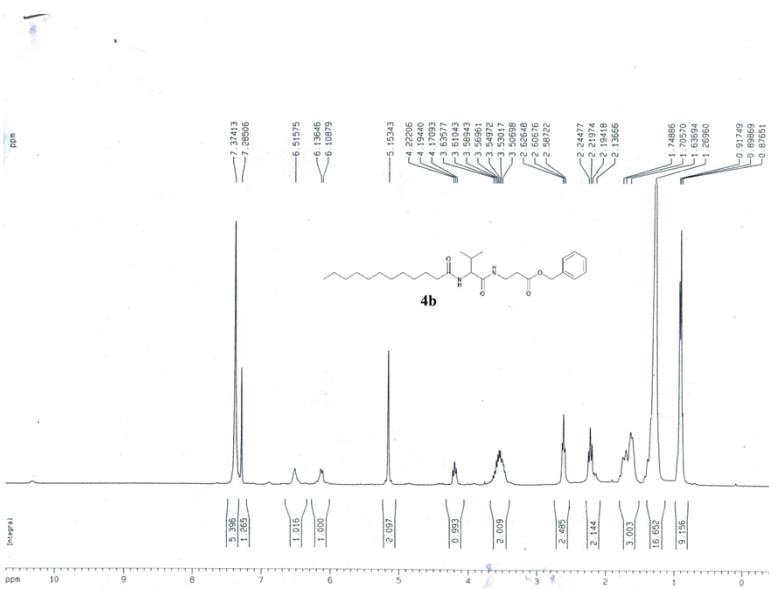

$^1H$ NMR spectra of gelator **4b**.

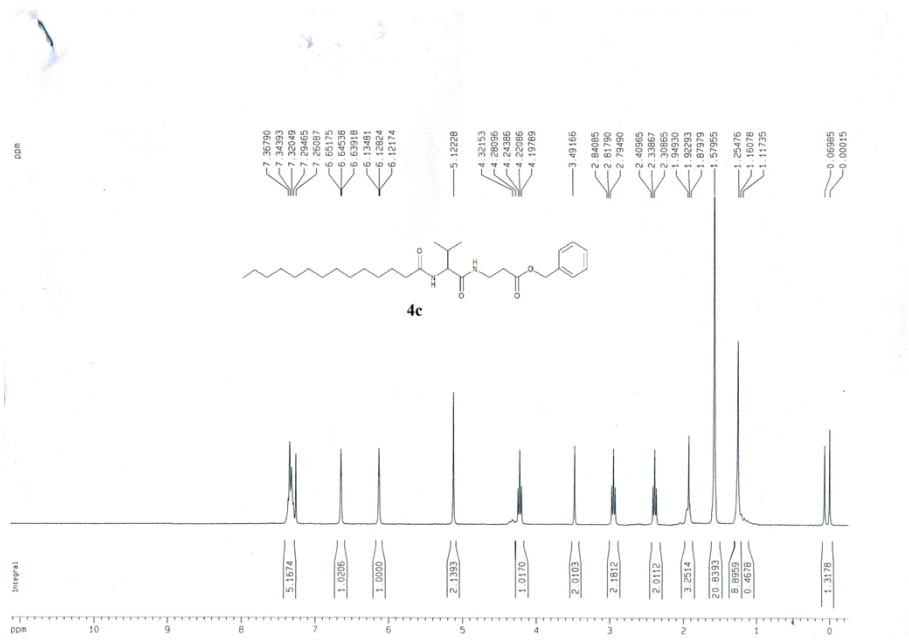

<sup>1</sup>H NMR spectra of gelator **4c**.

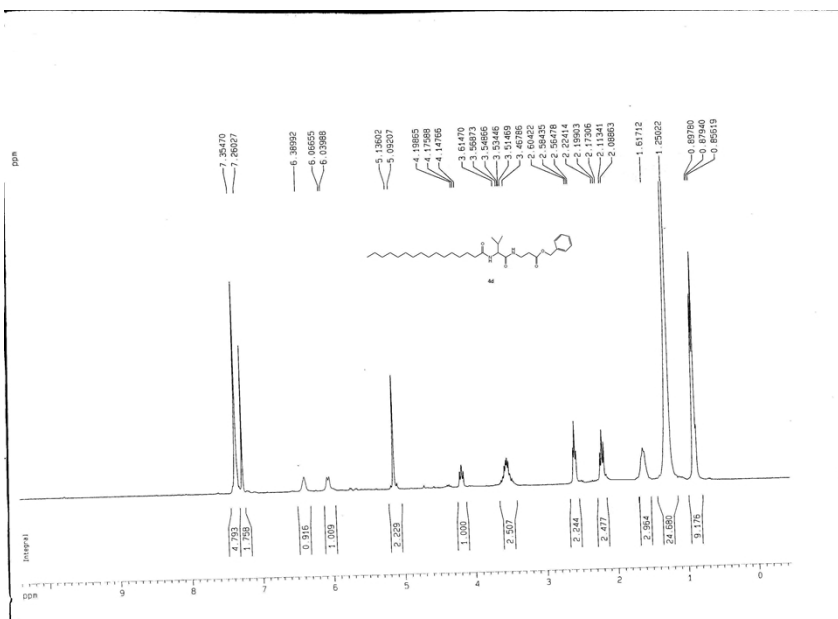

<sup>1</sup>H NMR spectra of gelator **4d**.

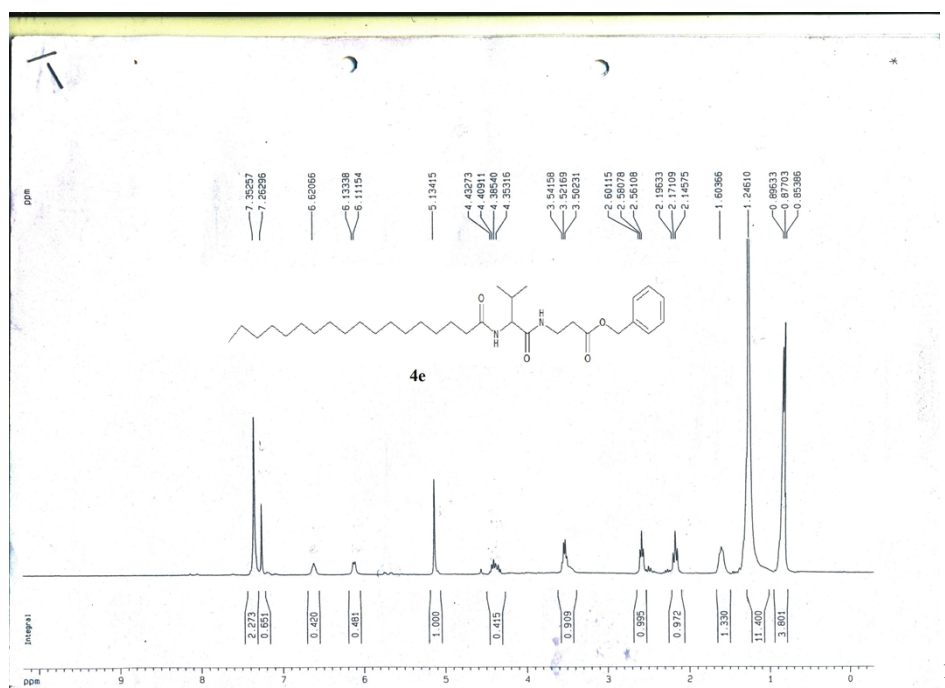

HNMR spectra of gelator **4e**.

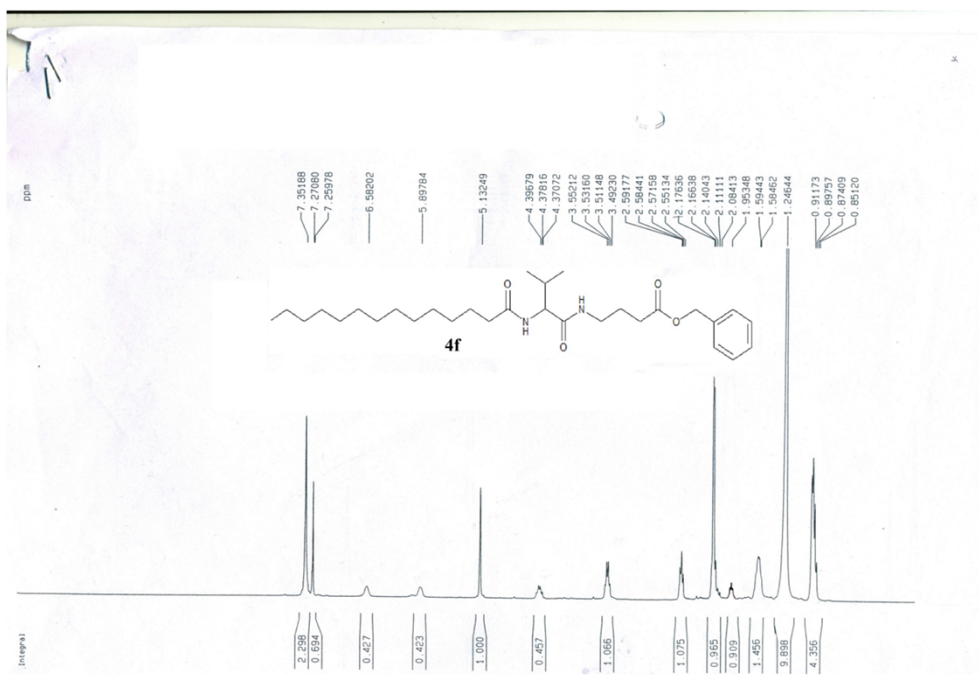



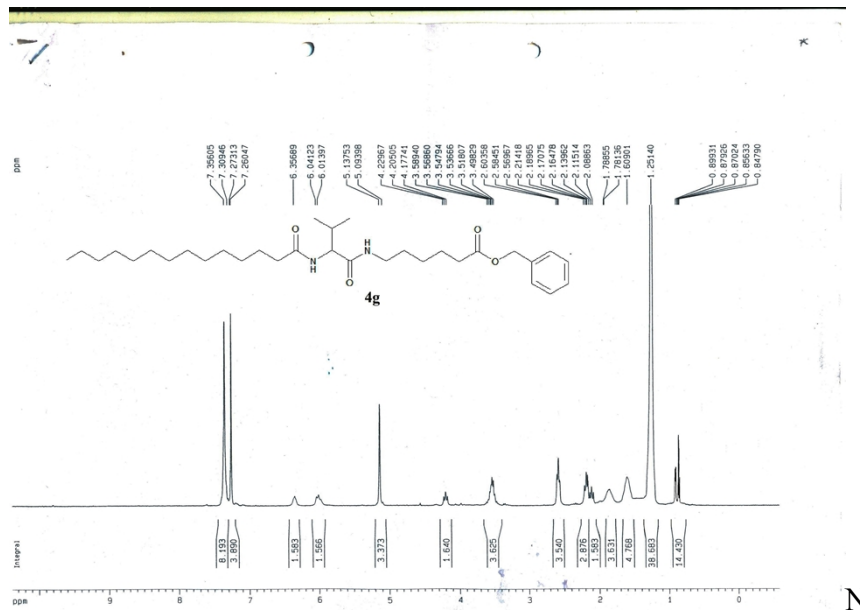

MR spectra of gelator **4g**.

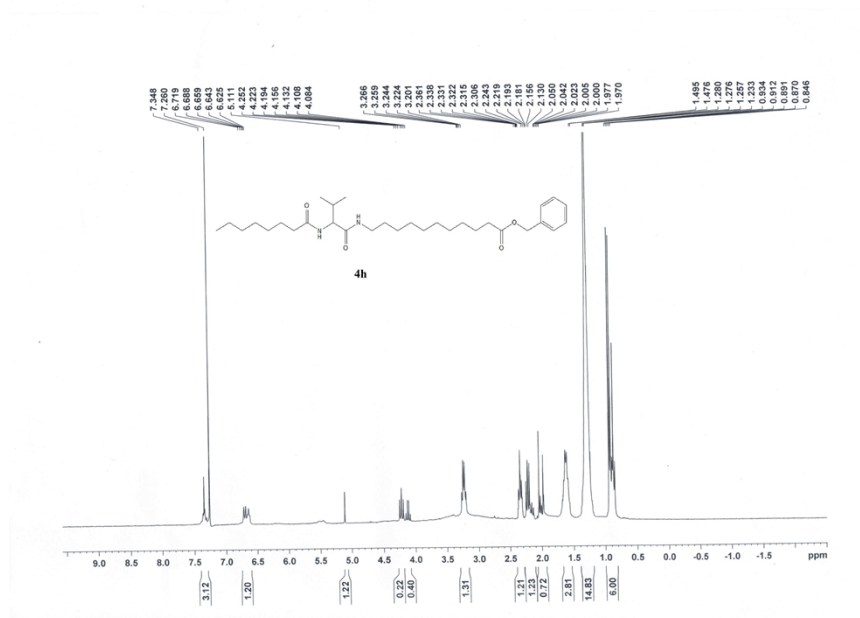

NMR spectra of gelator **4h**.

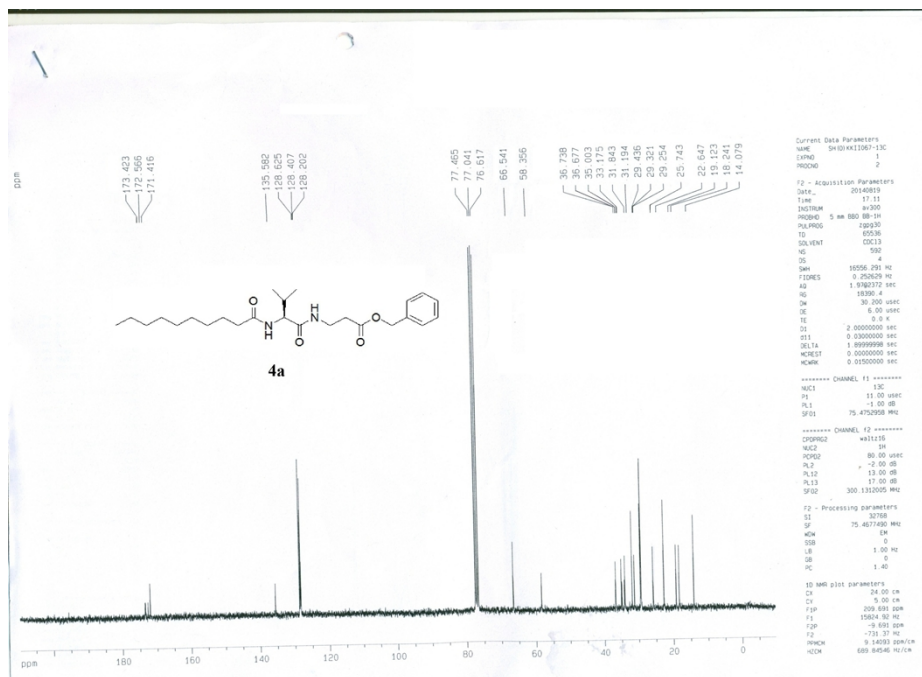

<sup>13</sup>C NMR spectra of gelator **4a**.

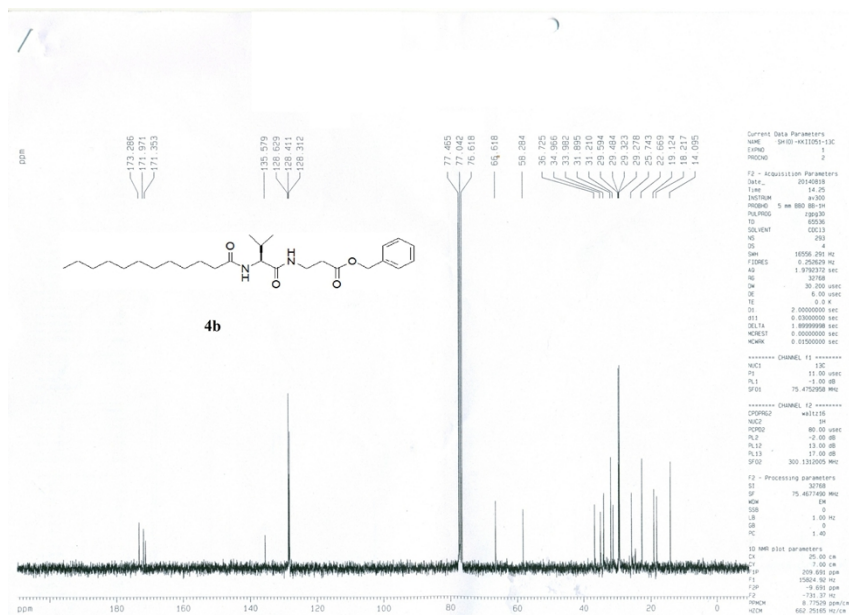

<sup>13</sup>C NMR spectra of gelator **4b**.

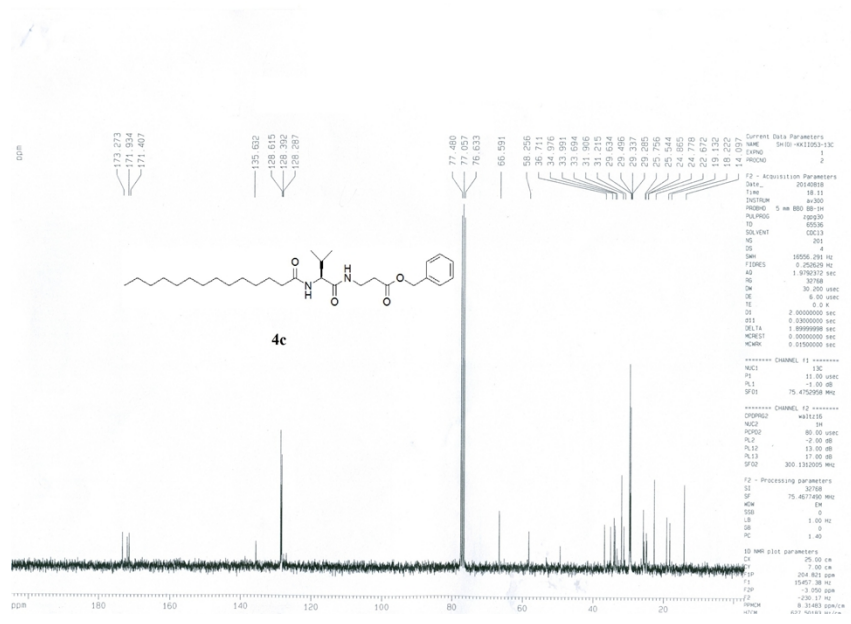

<sup>13</sup>C NMR spectra of gelator **4c**.

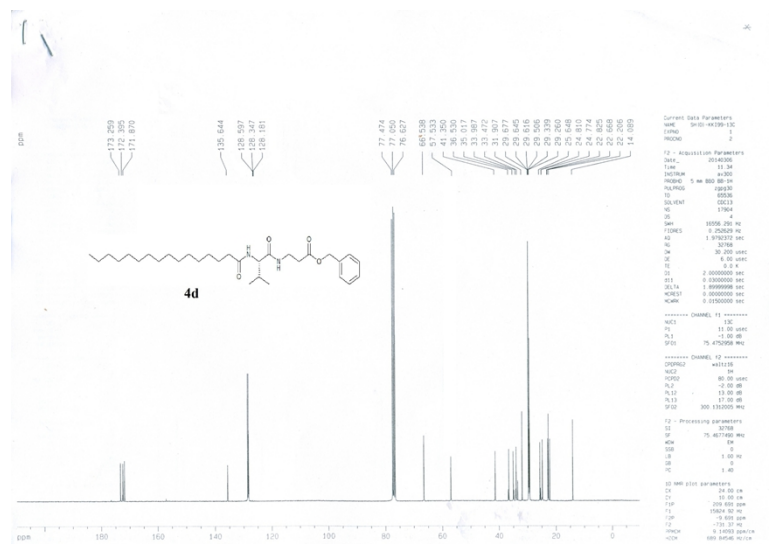

<sup>13</sup>C NMR spectra of gelator **4d**.

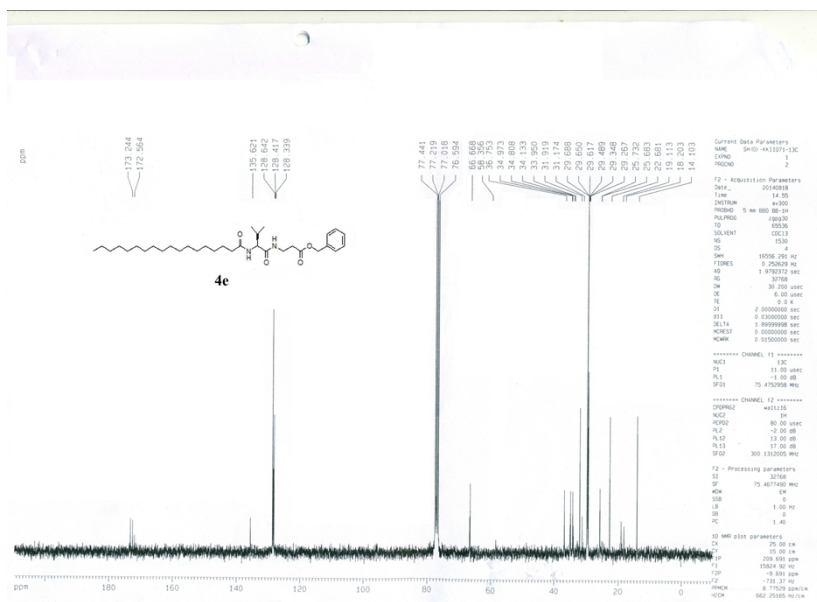

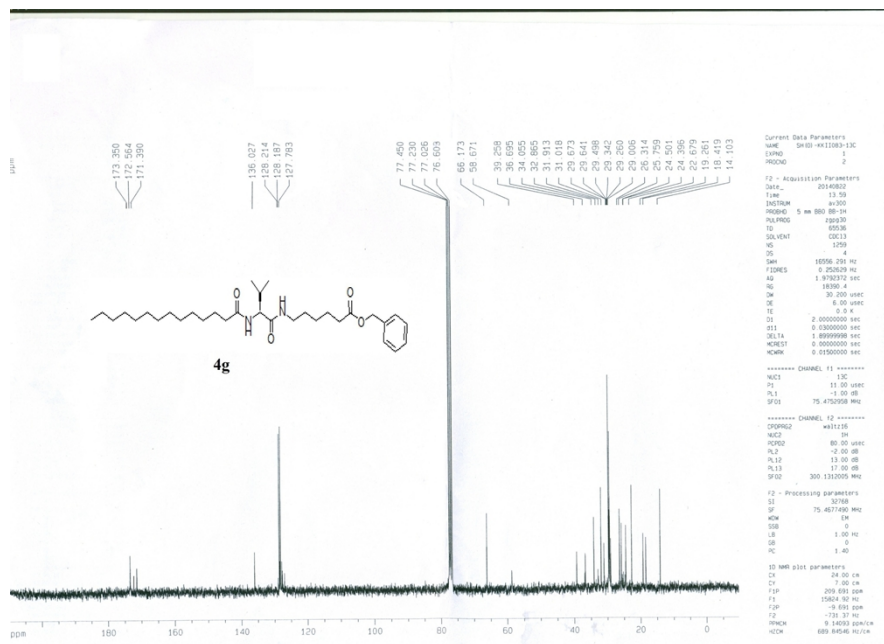

<sup>13</sup>C NMR spectra of gelator **4g**.

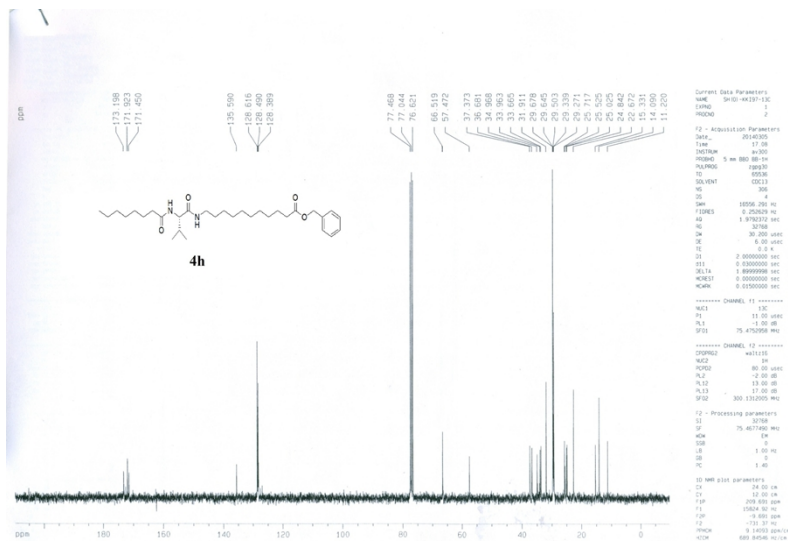

<sup>13</sup>C NMR spectra of gelator **4h**.

Table S1.. Gelation number and Gel to Sol phase transition temperature ( $T_{gel}$ ) of gelators in different solvents

| c LogP→           | (4a) |                | (4b) |                | (4c) |                | (4d) |                | (4e) |                | (4f) |                | (4g) |                | (4h) |                |
|-------------------|------|----------------|------|----------------|------|----------------|------|----------------|------|----------------|------|----------------|------|----------------|------|----------------|
|                   | GN   | T <sub>g</sub> |
| Benzene           | 30   | 32.8           | 231  | 33.8           | 243  | 35.8           | 322  | 40.9           | 312  | 37.6           | 56   | 33.1           | 96   | 34.1           | 143  | 33.8           |
| O-Xylene          | 32   | 32.6           | 188  | 33.6           | 196  | 35.6           | 265  | 41.3           | 232  | 36.4           | 48   | 33.1           | 87   | 34             | 112  | 33.5           |
| Toluene           | 22   | 32.4           | 173  | 33.4           | 174  | 35.7           | 202  | 41.4           | 183  | 36             | 44   | 33.3           | 89   | 33.8           | 112  | 33.5           |
| O-DCB             | 30   | 33.2           | 174  | 33.2           | 181  | 36.2           | 199  | 44.2           | 193  | 36.2           | -    | -              | -    | -              | WG   | -              |
| Anisole           | 21   | 32             | 66   | 32             | 73   | 35.5           | 85   | 39.1           | 79   | 36             | 55   | 33.4           | 87   | 33.9           | 155  | 33.9           |
| P E               | s    |                | 54   | 33.7           | 52   | 36.1           | 64   | 58.8           | 62   | 38             | s    | -              | s    | -              | s    | -              |
| Hexane            | 410  | 33.9           | 398  | 35.1           | 270  | 37.1           | 240  | 42.1           | 113  | 38.8           | 144  | 34.6           | 185  | 36.5           | s    | -              |
| Cyclohexane       | 124  | 33             | 157  | 33.9           | 200  | 35.6           | 302  | 42.5           | 295  | 38.9           | 140  | 34.2           | 149  | 34.5           | s    | -              |
| THF               | s    | -              | s    | -              | s    | -              | s    | -              | s    | -              | s    | -              | s    | -              | s    | -              |
| CHCl <sub>3</sub> | s    | -              | s    | -              | s    | -              | s    | -              | s    | -              | s    | -              | s    | -              | s    | -              |
| Dioxane           | s    | -              | s    | -              | s    | -              | s    | -              | s    | -              | s    | -              | s    | -              | s    | -              |
| Acetonitrile      | 107  | 33.4           | 532  | 34.1           | 551  | 35.5           | 863  | 47.9           | 762  | 38.7           | 184  | 34.1           | 375  | 34.9           | 217  | 34.5           |
| EIOAc             | 17   | 32.1           | 104  | 33.3           | 159  | 36.1           | 216  | 38             | 154  | 37.1           | 93   | 33.8           | 116  | 34.2           | 108  | 33.4           |
| DMF               | s    | -              | 112  | 31.8           | 143  | 35.3           | 165  | 30.5           | 154  | 37.4           | -    | -              | -    | -              | -    | -              |
| DMSO              | 60   | 32.3           | 215  | 33.4           | 234  | 36.2           | 238  | 54.3           | 253  | 37.8           | 155  | 33.8           | 229  | 34.3           | 102  | 34             |
| Acetone           | 68   | 32.5           | 135  | 33.5           | 225  | 35.5           | 487  | 44.2           | 150  | 37.8           | 153  | 33.7           | 220  | 33.9           | s    | -              |
| Nitromethane      | 319  | 33.6           | 729  | 34.9           | 836  | 36.8           | 2981 | 49.8           | 680  | 38.1           | 788  | 34.9           | 823  | 35.7           | -    | -              |
| MeOH              | 74   | 32.1           | 271  | 33.1           | 310  | 35.8           | 500  | 51             | 333  | 36.5           | 101  | 33.4           | 164  | 33.8           | s    | -              |
| 80% aq MeOH       | 225  | 33.8           | 559  | 34.5           | 738  | 36.4           | 999  | 39.8           | 851  | 38             | 556  | 34.9           | 598  | 35             | s    | -              |
| 70% aq MeOH       | 114  | 33.6           | 456  | 34.2           | 695  | 36             | 886  | 39.5           | 710  | 37.8           | 434  | 34.5           | 502  | 34.9           | s    | -              |
| 50% aq MeOH       | 93   | 33.5           | 392  | 34             | 477  | 35.8           | 656  | 39.1           | 521  | 37.7           | 331  | 33.9           | 379  | 34             | s    | -              |
| 40% aq MeOH       | s    | -              | s    | -              | s    | -              | s    | -              | s    | -              | s    | -              | s    | -              | s    | -              |
| EtOH              | 66   | 32             | 127  | 33.4           | 150  | 35.4           | 364  | 50             | 141  | 37.2           | 94   | 33.4           | 111  | 33.8           | s    | -              |
| 80% aq EtOH       | 231  | 33.8           | 691  | 34.5           | 933  | 36.3           | 1377 | 41.2           | 1091 | 38.2           | 667  | 34.8           | 722  | 34.8           | s    | -              |
| 70% aq EtOH       | 104  | 33.7           | 511  | 34.1           | 550  | 35.9           | 959  | 39.9           | 898  | 37.9           | 225  | 34.2           | 312  | 34.1           | s    | -              |
| 2-Propanol        | s    | -              | 77   | 33.5           | 89   | 35.2           | 113  | 35.9           | 110  | 36.2           | 55   | 33.6           | 94   | 33.9           | s    | -              |
| Butanol           | s    | -              | 84   | 33.7           | 101  | 35.5           | 187  | 36.4           | 132  | 36.6           | 84   | 33.4           | 112  | 34.6           | s    | -              |
| 50% aq EG         | is   | -              |
| 50% aq Glycerol   | is   | -              |

O-DCB= O-Dichlorobenzene P E= Petroleum ether EG= Ethylene Glycol

Rheology:

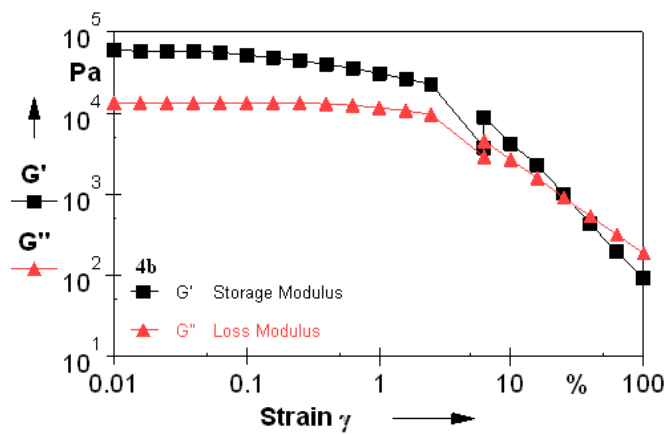

Figure S1. Strain amplitude sweep experiment ( $\omega$  at 10rads/sec) for **(4b)** in acetonitrile.

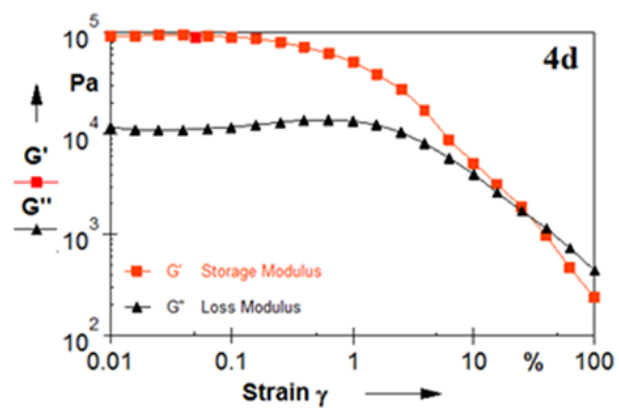

Figure S2. Strain amplitude sweep experiment ( $\omega$  at 10rads/sec) for **(4d)** in acetonitrile.

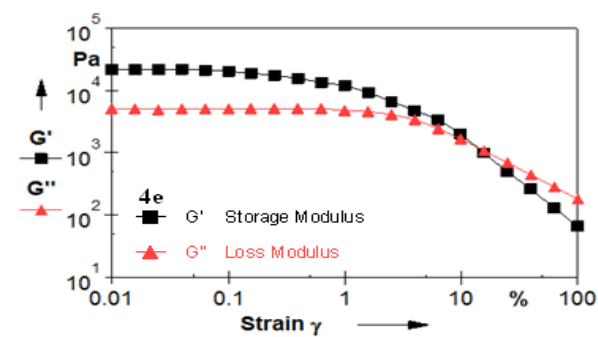

Figure S3. Strain amplitude sweep experiment ( $\omega$  at 10rads/sec) for **(4e)** in acetonitrile

## Continuation of Rheology....

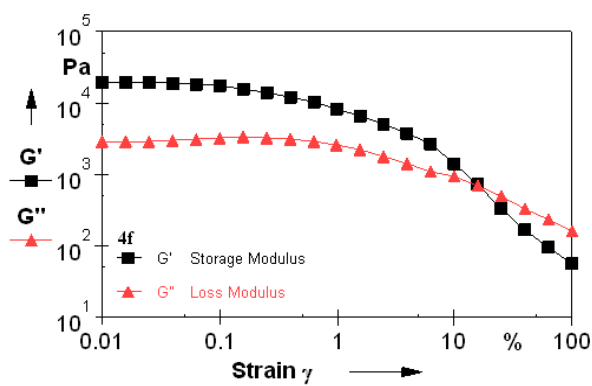

Figure S4. Strain amplitude sweep experiment ( $\omega$  at 10 rad/sec) for **(4f)** in acetonitrile.

## Thermal stability

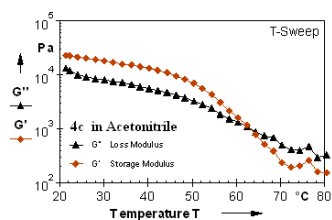

Figure S5. Temperature sweep experiment for **(4c)** in acetonitrile

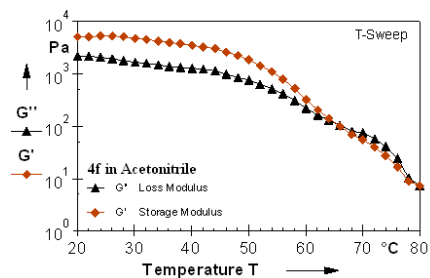

Figure S6. Temperature sweep experiment for **(4f)** in acetonitrile



Continuation of Thermal Stability.....

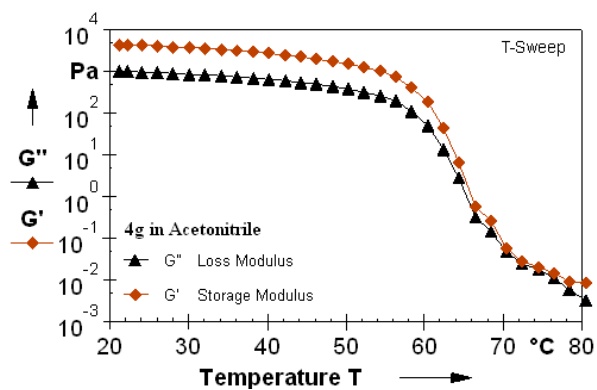

Figure S7. Temperature sweep experiment for (**4g**) in acetonitrile

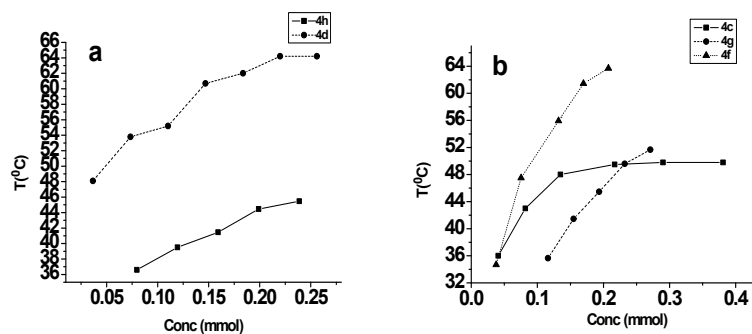

Figure S8.  $T_{gel}$  ( $^{\circ}\text{C}$ ) versus concentration (mmoles) plots for gelators of (a) SET-II and (b) SET-III in Acetonitrile.

XRD :

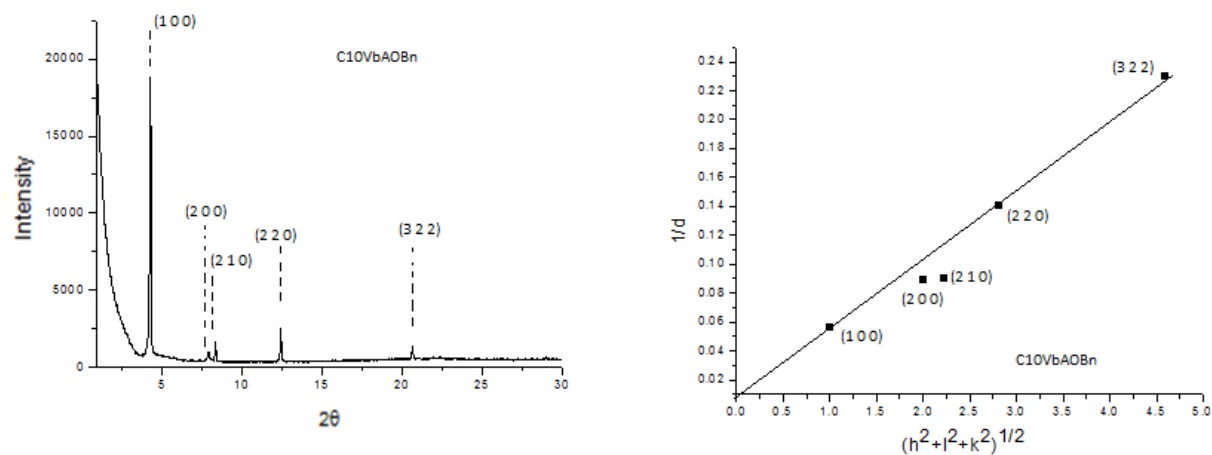

Figure S9. XRD profile of xerogels (intensity vs.  $2\theta$ ) for **4a** in acetonitrile and its corresponding plot of  $d^{-1}$  vs.  $\sqrt{(h^2+l^2+k^2)}$ .

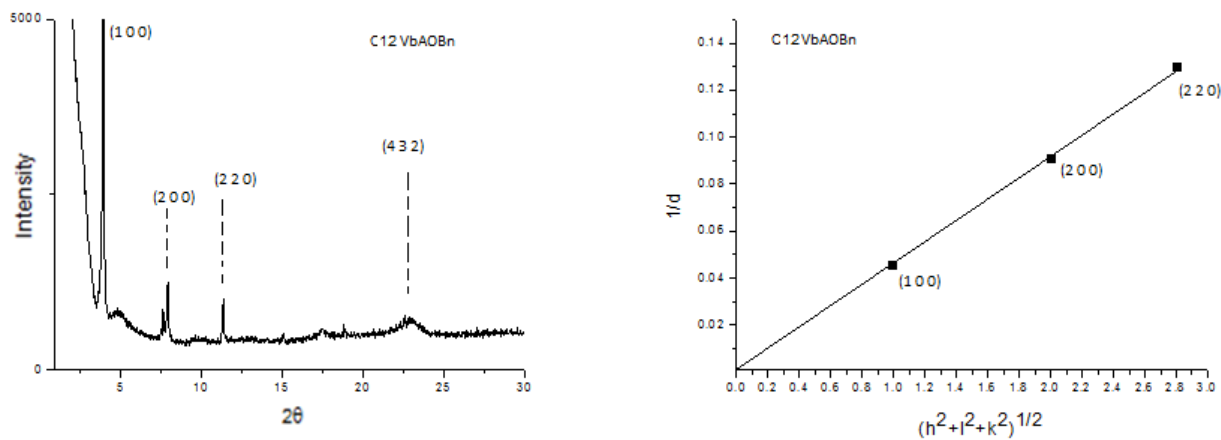

Figure S10. XRD profile of xerogels (intensity vs.  $2\theta$ ) for **4b** in acetonitrile and its corresponding plot of  $d^{-1}$  vs.  $\sqrt{(h^2+l^2+k^2)}$ .

Continuation of XRD....

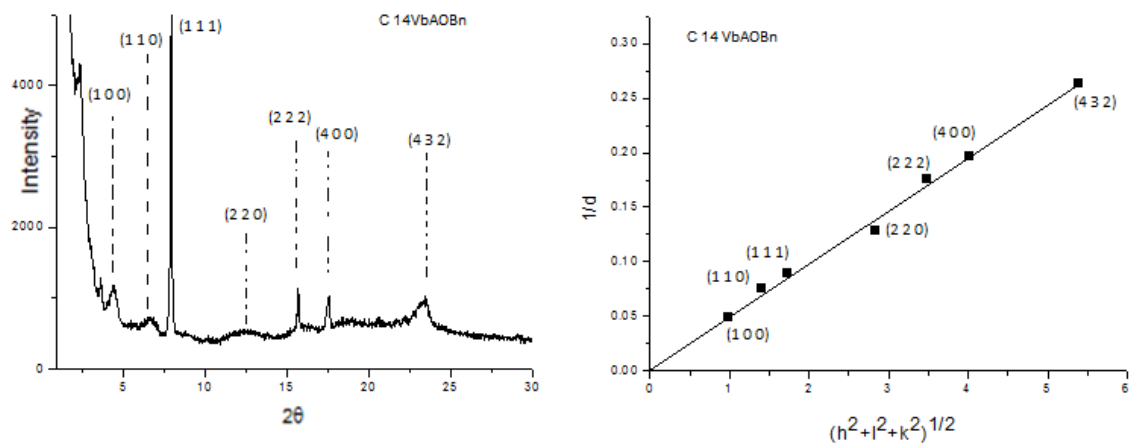

Figure

S11. XRD profile of xerogels (intensity vs.  $2\theta$ ) for **4c** in acetonitrile and its corresponding plot of  $d^{-1}$  vs.  $\sqrt{(h^2+l^2+k^2)}$ .

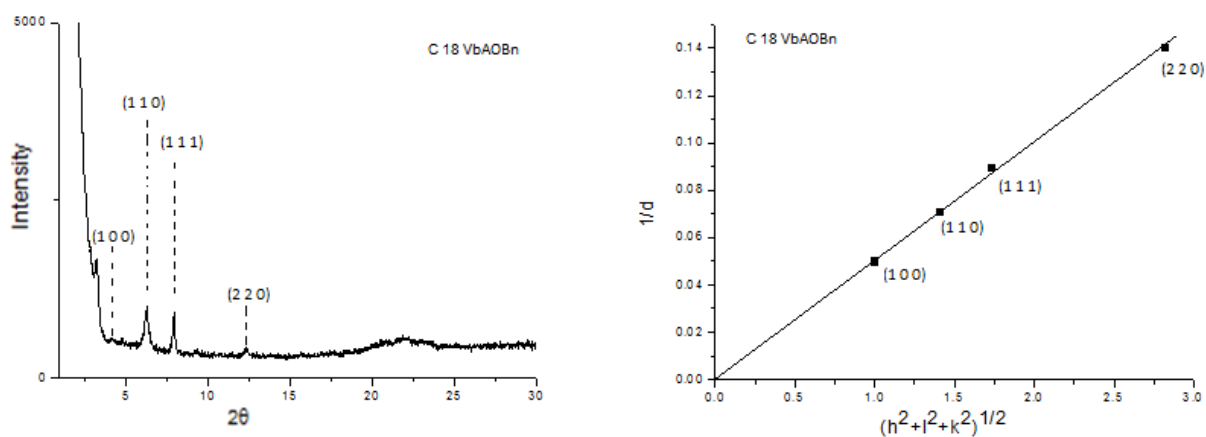

**Figure S12.** XRD profile of xerogels (intensity vs.  $2\theta$ ) for **4e** in acetonitrile and its corresponding plot of  $d^{-1}$  vs.  $\sqrt{(h^2+l^2+k^2)}$ .

Continuation of XRD....

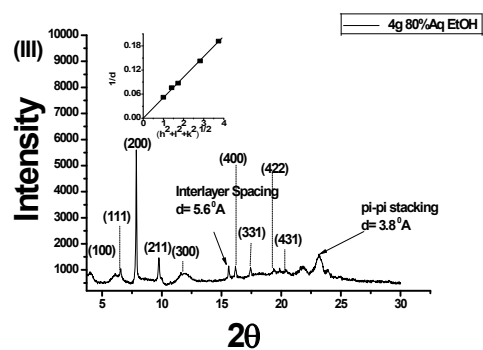

Figure S13.XRD profile of xerogels (intensity vs.  $2\theta$ ) for **4g** in 80%(v/v) Ethanol.H<sub>2</sub>O and its corresponding plot of  $d^{-1}$  vs.  $\sqrt{(h^2+l^2+k^2)}$  (at inset).

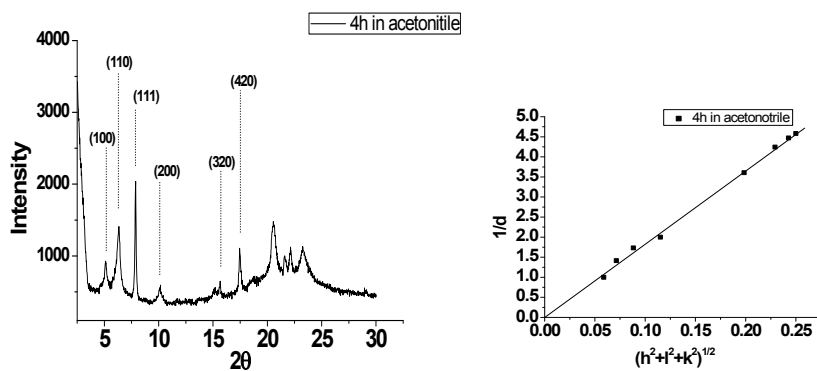

Figure S14.XRD profile of xerogels (intensity vs.  $2\theta$ ) for **4h** in acetonitrile and its corresponding plot of  $d^{-1}$  vs.  $\sqrt{(h^2+l^2+k^2)}$ .

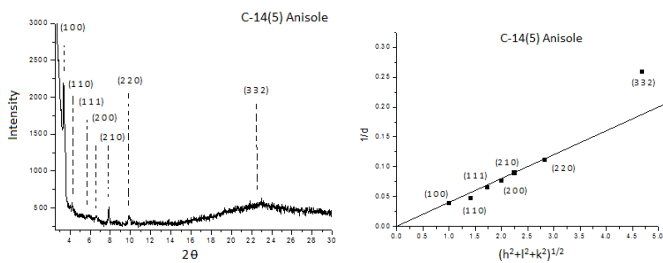

Figure S14.XRD profile of xerogels (intensity vs.  $2\theta$ ) for **4g** in anisole and its corresponding plot of  $d^{-1}$  vs.  $\sqrt{(h^2+l^2+k^2)}$ .

Continuation of XRD.....

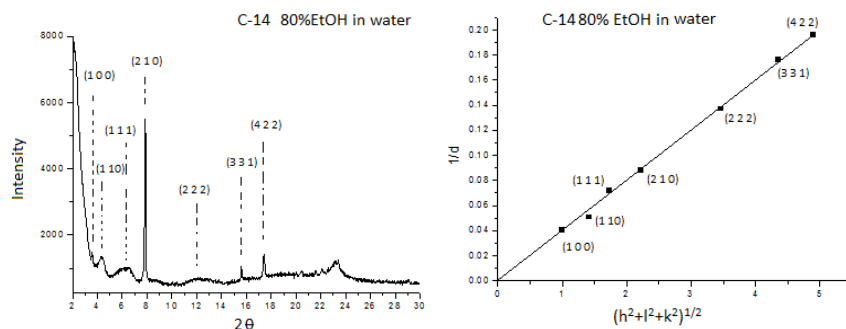

Figure S15. XRD profile of xerogels (intensity vs.  $2\theta$ ) for **4c** in 80% aq. EtOH and its corresponding plot of  $d^{-1}$  vs.  $\sqrt{(h^2+l^2+k^2)}$ .

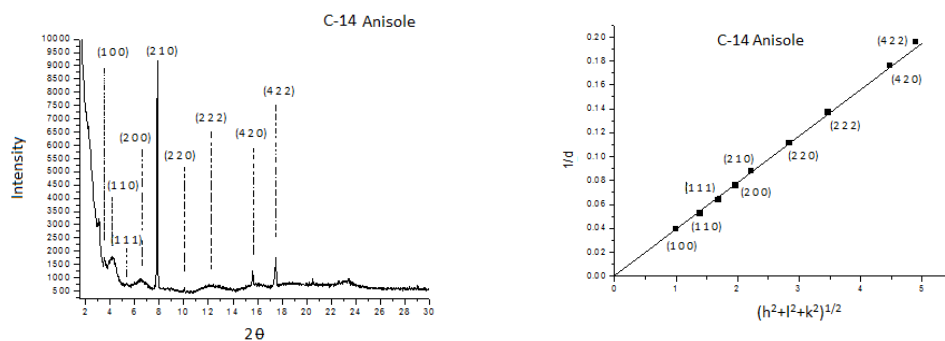

Figure S16. XRD profile of xerogels (intensity vs.  $2\theta$ ) for **4c** in Anisole and its corresponding plot of  $d^{-1}$  vs.  $\sqrt{(h^2+l^2+k^2)}$ .

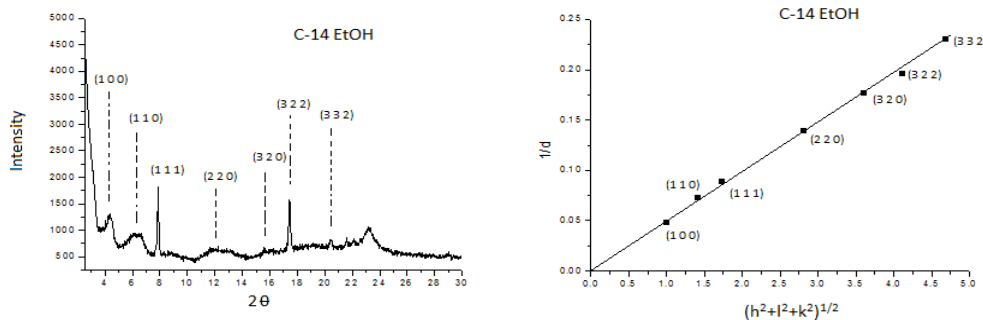

Figure S17. XRD profile of xerogels (intensity vs.  $2\theta$ ) for **4c** in EtOH and its corresponding plot of  $d^{-1}$  vs.  $\sqrt{(h^2+l^2+k^2)}$ .

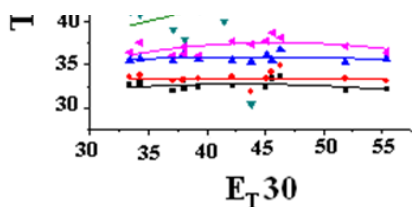

Solvent effect:

Figure S18.  $E_{T30}$  versus  $T_g$  plot of gelator **4a**, **4b**, **4c**, **4d** and **4e** in different solvents.

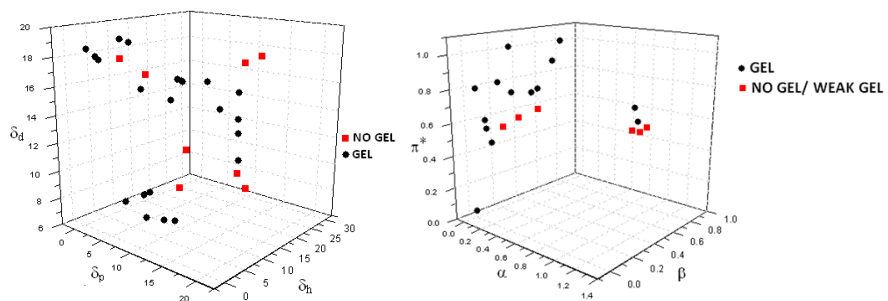

Figure S19.3D plots of Hansen and Kamlet Taft parameters at different solvent for **4a-4g** gelators.

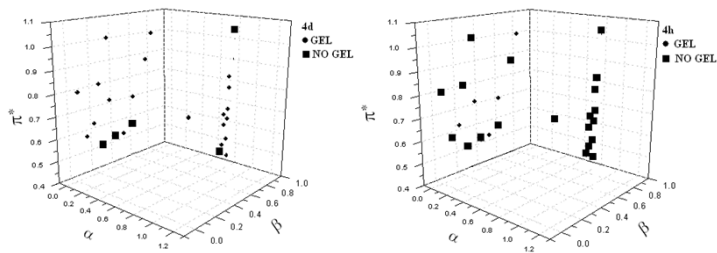

Figure S20. Comparison of 3D plots of Kamlet Taft parameters at different solvents for **4d-4h** gelators.

Continuation of Solvent effect....

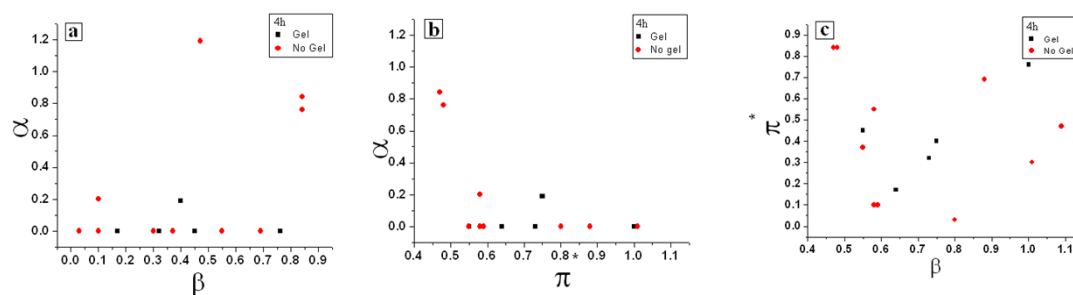

Figure S22. Plots of

Figure S21. Plots of  $\delta_p$  vs  $\delta_h$ ,  $\delta_d$  vs  $\delta_h$  and  $\delta_p$  vs  $\delta_d$  (HSP) for gelator **4h** [gelation is found in solvents with lower  $\delta_h$  values, i.e., solvents with lower H-bonding capability].

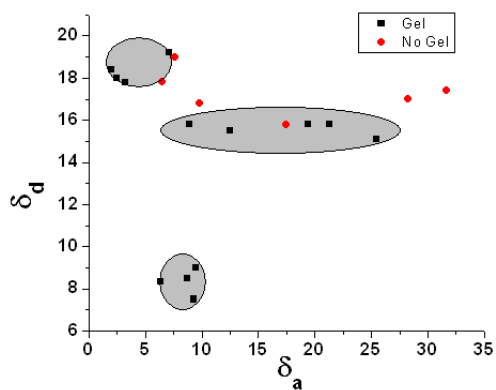

Figure S23. Plots of  $\delta_d$  vs  $\delta_h$  for gelators **4a-4g**.

Continuation of Solvent effect....

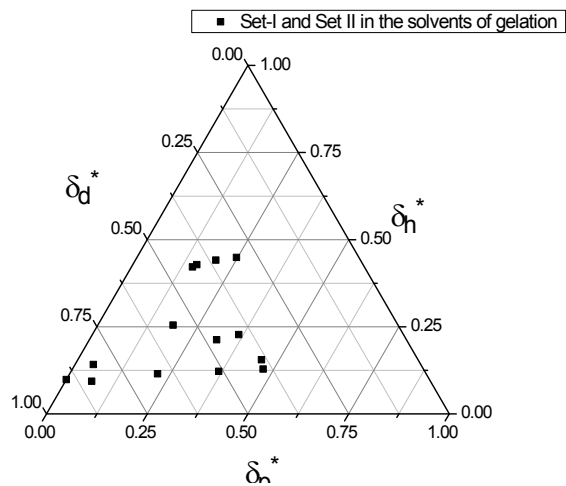

Figure S24. Teas plot of Hansen Parameters for gelators of Set-I and Set -II in solvents of gelation.

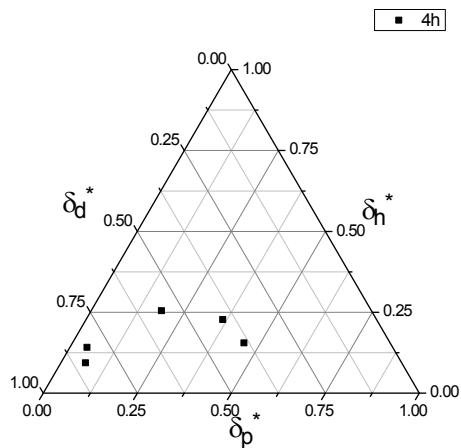

Figure S25. Teas plot of Hansen Parameters for **4h** in solvents of gelation.



CD

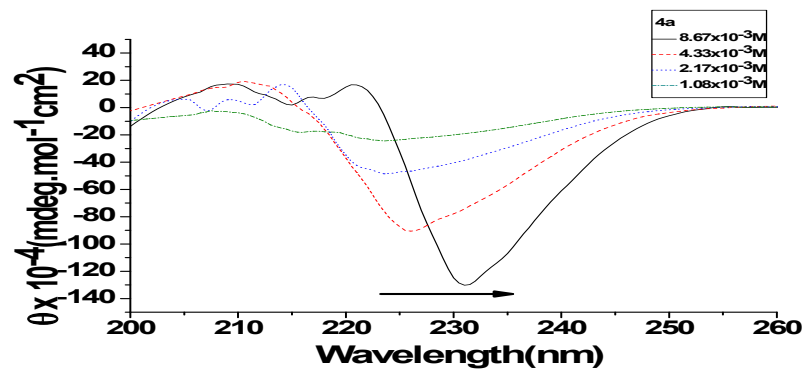

Figure S26. CD spectra of **4f** at different concentrations.

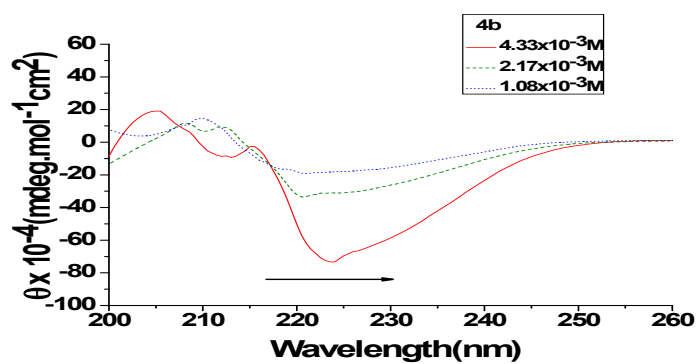

Figure S27. CD spectra of **4f** at different concentrations.

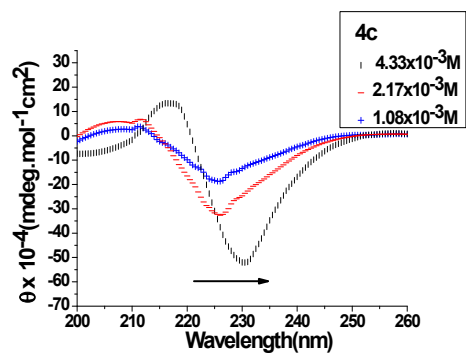

Figure S28. CD spectra of **4f** at different concentrations.

Continuation of CD.....

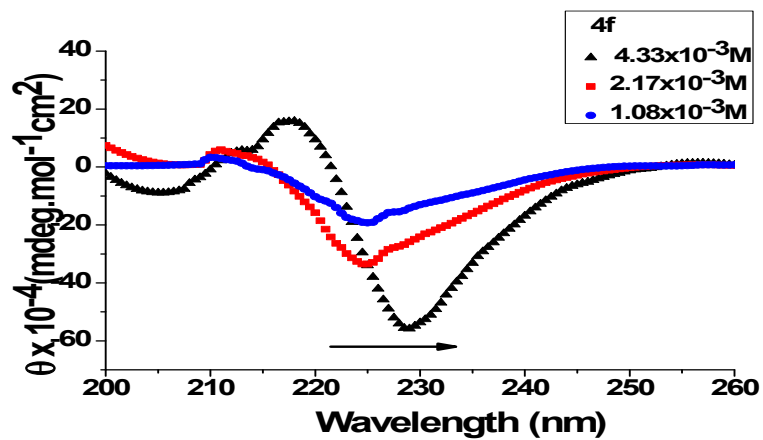

Figure S29. CD spectra of **4f** at different concentrations.

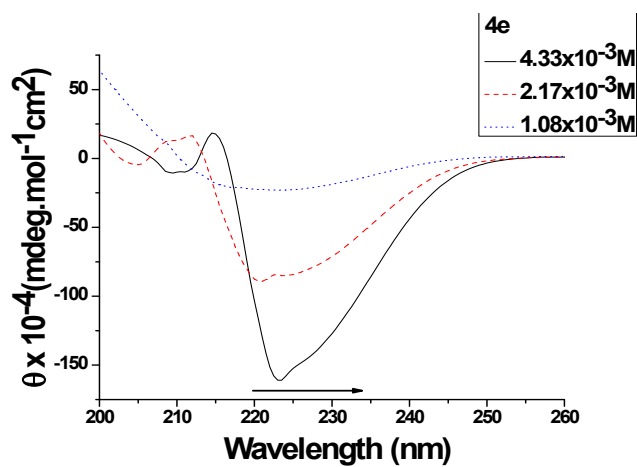

Figure S30. CD spectra of **4e** at different concentrations.

FT-IR spectra:

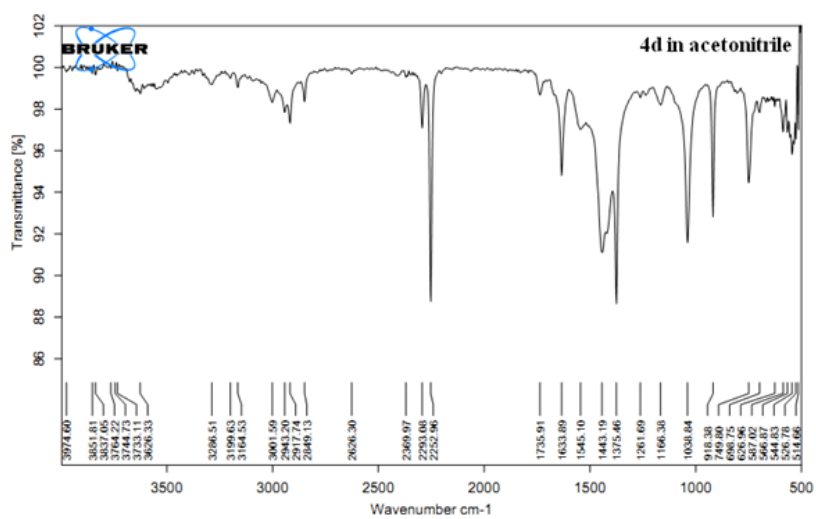

Figure S31. IR spectra of gelator **4d** in acetonitrile in gel state.

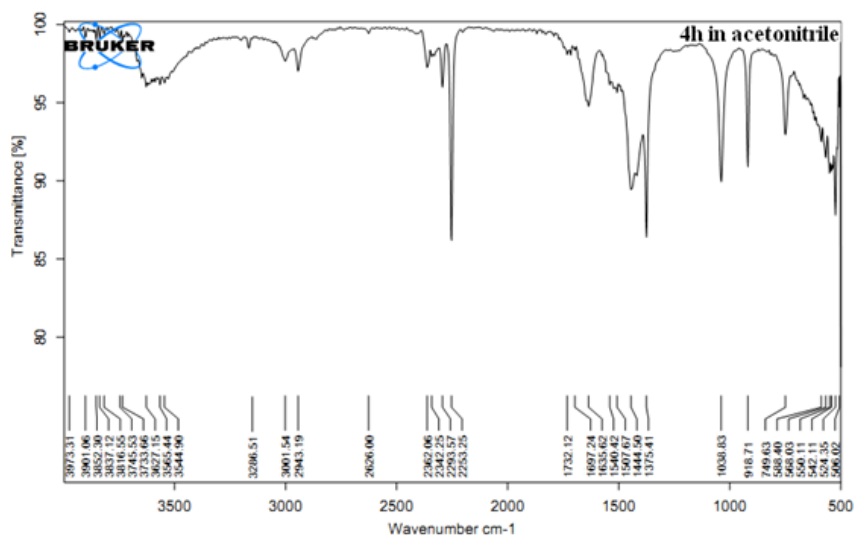

Figure S32. IR spectra of gelator **4h** in acetonitrile in gel state.

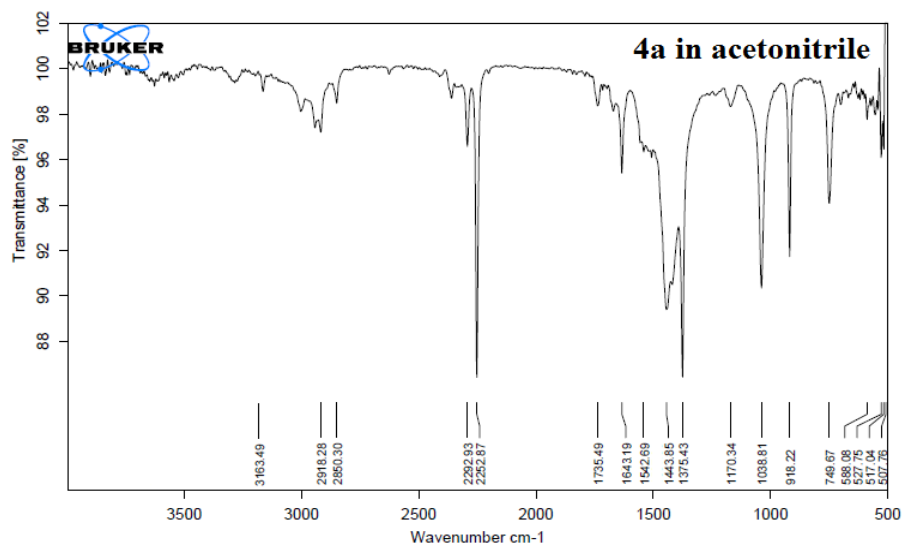

Figure S33. IR spectra of gelator **4a** in acetonitrile in gel state.

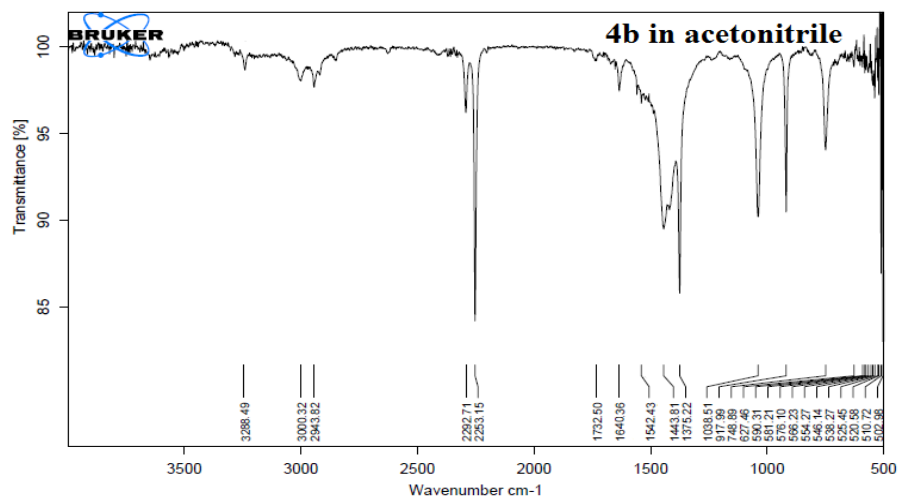

Figure S34. IR spectra of gelator **4b** in acetonitrile in gel state.

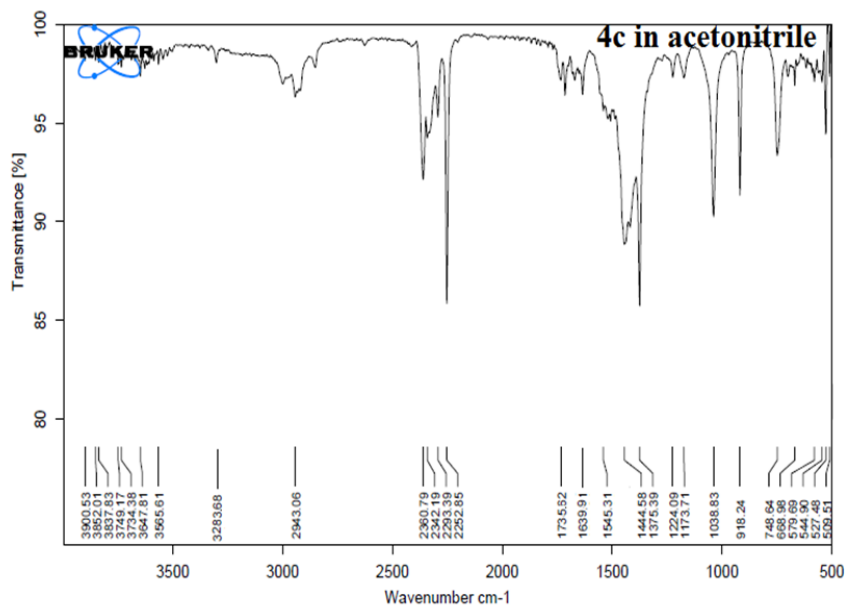

Figure S35. IR spectra of gelator **4c** in acetonitrile in gel state.

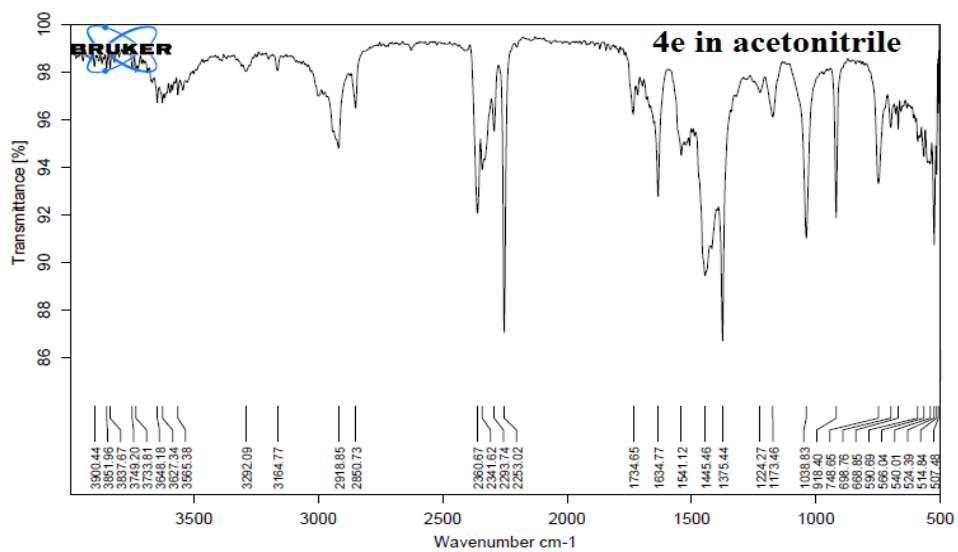

Figure S36. IR spectra of gelator **4e** in acetonitrile in gel state.

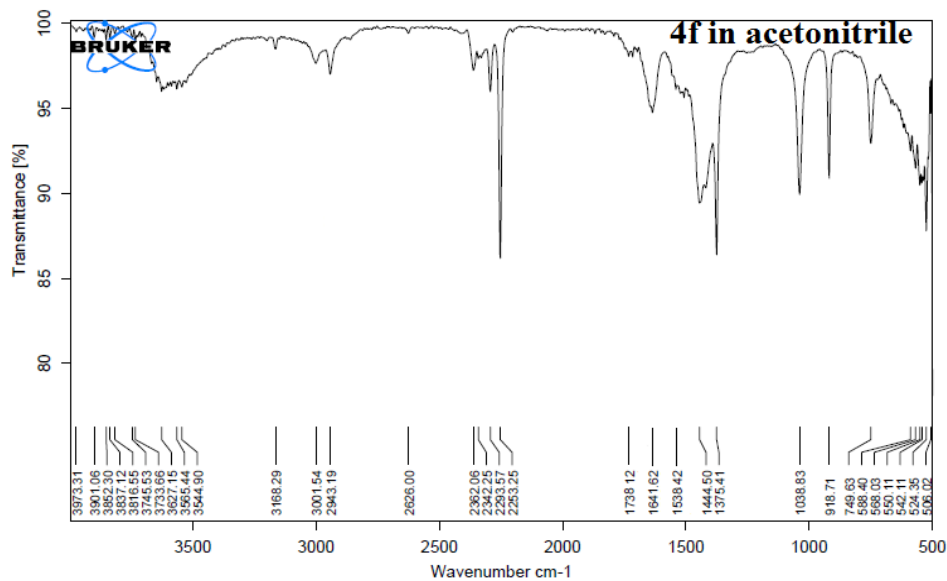

Figure S37. IR spectra of gelator **4f** in acetonitrile in gel state.

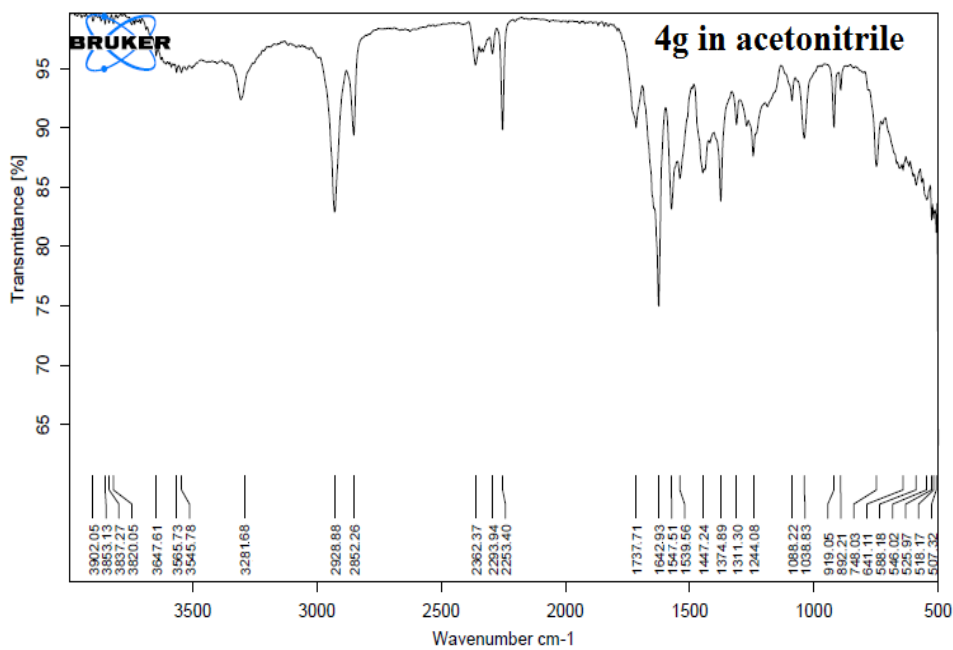

Figure S38. IR spectra of gelator **4g** in acetonitrile in gel state.
